# Supplementary material for: In silico Identification of Serovar-Specific Genes for Salmonella Serotyping
Source: Front Microbiol. 2019 Apr 24;10:835. doi: 10.3389/fmicb.2019.00835 (PMC6491675; doi:10.3389/fmicb.2019.00835)
Supplement: TABLE S3 — An additional 1089 validation isolates with serovar prediction results by SISTR, SeqSero and serovar-specific gene markers. [file Table_3.XLSX]

## Sheet: serovar_prediction
srr	serovar	no of genomes	sistr prediction	sistr-match	SeqSero prediction	SeqSero-match	Serovar specific gene prediction	specific gene match
SRR6312624	Abaetetuba	5	Abaetetuba	True positives	N/A (The predicted antigenic profile does not exist in the White-Kauffmann-Le Minor scheme)	Failed	Glostrup,Aberdeen	Failed
SRR1249000	Abaetetuba	5	Abaetetuba	True positives	Abaetetuba	True positives	Potsdam,Aberdeen,Rubislaw	Failed
SRR3027567	Abaetetuba	5	Abaetetuba	True positives	Abaetetuba	True positives	Abaetetuba,Rubislaw	partial assigned (one or more false positives)
SRR5990405	Abaetetuba	5	Abaetetuba	True positives	Abaetetuba	True positives	Abaetetuba,Rubislaw	partial assigned (one or more false positives)
SRR3242167	Abaetetuba	5	Abaetetuba	True positives	Abaetetuba	True positives	Abaetetuba	exact assigned
ERR230432	Aberdeen	6	Aberdeen	True positives	Aberdeen	True positives	Aberdeen,Rubislaw	partial assigned (one or more false positives)
SRR1636528	Aberdeen	6	Aberdeen	True positives	Aberdeen	True positives	Aberdeen,Rubislaw	partial assigned (one or more false positives)
SRR1982185	Aberdeen	6	Aberdeen	True positives	Aberdeen	True positives	Aberdeen,Rubislaw	partial assigned (one or more false positives)
SRR2533820	Aberdeen	6	Aberdeen	True positives	Aberdeen	True positives	Aberdeen,Rubislaw	partial assigned (one or more false positives)
SRR6518318	Aberdeen	6	Aberdeen	True positives	Aberdeen	True positives	Aberdeen,Rubislaw	partial assigned (one or more false positives)
SRR2085739	Aberdeen	6	Aberdeen	True positives	Aberdeen	True positives	Aberdeen	exact assigned
SRR1265013	Abony	1	Abony	True positives	N/A (The predicted antigenic profile does not exist in the White-Kauffmann-Le Minor scheme)	Failed	Abony	exact assigned
ERR2223876	Adelaide	1	Adelaide	True positives	Adelaide	True positives	Adelaide	exact assigned
ERR1817131	Agama	2	Agama	True positives	Agama	True positives	Agama	exact assigned
SRR1958153	Agama	2	Agama	True positives	Agama	True positives	Agama	exact assigned
SRR5364160	Agbeni	2	Agbeni	True positives	Bron or Agbeni*	True positives	Agbeni	exact assigned
SRR5584643	Agbeni	2	Agbeni	True positives	Bron or Agbeni*	True positives	Agbeni	exact assigned
ERR178894	Agona	10	Agona	True positives	N/A (The predicted antigenic profile does not exist in the White-Kauffmann-Le Minor scheme)	Failed	Agona	exact assigned
ERR160959	Agona	10	Agona	True positives	Agona	True positives	Agona	exact assigned
SRR1840616	Agona	10	Agona	True positives	Agona	True positives	Agona	exact assigned
SRR1965714	Agona	10	Agona	True positives	Agona	True positives	Agona	exact assigned
SRR3110331	Agona	10	Agona	True positives	Agona	True positives	Agona	exact assigned
SRR3321800	Agona	10	Agona	True positives	Agona	True positives	Agona	exact assigned
SRR5341518	Agona	10	Agona	True positives	Agona	True positives	Agona	exact assigned
SRR5585278	Agona	10	Agona	True positives	Agona	True positives	Agona	exact assigned
SRR5646901	Agona	10	Agona	True positives	Agona	True positives	Agona	exact assigned
SRR6311918	Agona	10	Agona	True positives	Agona	True positives	Agona	exact assigned
SRR1643088	Alachua	1	Alachua	True positives	Alachua or IIIa 35:z4,z23:-*	True positives	Newport-I&III,Oranienburg	Failed
ERR1046136	Albany	4	Albany	True positives	Albany or Duesseldorf*	Failed	Albany	exact assigned
SRR1060568	Albany	4	Albany	True positives	Corvallis or Chailey*	Failed	Albany	exact assigned
SRR3665168	Albany	4	Albany	True positives	Albany or Duesseldorf*	True positives	Albany	exact assigned
SRR6109684	Albany	4	Albany	True positives	Albany or Duesseldorf*	True positives	Albany	exact assigned
ERR1046193	Anatum	14	Anatum	True positives	Anatum	True positives	Anatum	exact assigned
ERR1046264	Anatum	14	Anatum	True positives	Anatum	True positives	Anatum	exact assigned
ERR1714996	Anatum	14	Anatum	True positives	Anatum	True positives	Anatum	exact assigned
SRR1206217	Anatum	14	Anatum	True positives	Anatum	True positives	Anatum	exact assigned
SRR1257297	Anatum	14	Anatum	True positives	Anatum	True positives	Anatum	exact assigned
SRR1953051	Anatum	14	Anatum	True positives	Anatum	True positives	Anatum	exact assigned
SRR2962337	Anatum	14	Anatum	True positives	Anatum	True positives	Anatum	exact assigned
SRR3001180	Anatum	14	Anatum	True positives	Anatum	True positives	Anatum	exact assigned
SRR3465394	Anatum	14	Anatum	True positives	Anatum	True positives	Anatum	exact assigned
SRR3488747	Anatum	14	Anatum	True positives	Anatum	True positives	Anatum	exact assigned
SRR4012380	Anatum	14	Anatum	True positives	Anatum	True positives	Anatum	exact assigned
SRR5194223	Anatum	14	Anatum	True positives	Anatum	True positives	Anatum	exact assigned
SRR5201061	Anatum	14	Anatum	True positives	Anatum	True positives	Anatum	exact assigned
SRR6283624	Anatum	14	Anatum	True positives	Anatum	True positives	Anatum	exact assigned
SRR1958140	Bareilly	19	Richmond	Failed	Richmond	Failed	Bareilly-I	exact assigned
ERR1046217	Bareilly	19	Bareilly	True positives	Bareilly	True positives	Bareilly-I	exact assigned
ERR2116063	Bareilly	19	Bareilly	True positives	Bareilly	True positives	Bareilly-I	exact assigned
SRR1043928	Bareilly	19	Bareilly	True positives	Bareilly	True positives	Bareilly-II	exact assigned
SRR1068326	Bareilly	19	Bareilly	True positives	Bareilly	True positives	Bareilly-I	exact assigned
SRR1233923	Bareilly	19	Bareilly	True positives	Bareilly	True positives	Bareilly-II	exact assigned
SRR1711804	Bareilly	19	Bareilly	True positives	Bareilly	True positives	Bareilly-II	exact assigned
SRR1967614	Bareilly	19	Bareilly	True positives	Bareilly	True positives	Bareilly-I	exact assigned
SRR3199881	Bareilly	19	Bareilly	True positives	Bareilly	True positives	Bareilly-II	exact assigned
SRR3290695	Bareilly	19	Bareilly	True positives	Bareilly	True positives	Bareilly-I	exact assigned
SRR3606561	Bareilly	19	Bareilly	True positives	Bareilly	True positives	Bareilly-I	exact assigned
SRR5110652	Bareilly	19	Bareilly	True positives	Bareilly	True positives	Bareilly-II	exact assigned
SRR5488030	Bareilly	19	Bareilly	True positives	Bareilly	True positives	Bareilly-II	exact assigned
SRR5851093	Bareilly	19	Bareilly	True positives	Bareilly	True positives	Bareilly-I	exact assigned
SRR5868559	Bareilly	19	Bareilly	True positives	Bareilly	True positives	Bareilly-II	exact assigned
SRR6107909	Bareilly	19	Bareilly	True positives	Bareilly	True positives	Bareilly-II	exact assigned
SRR6243618	Bareilly	19	Bareilly	True positives	Bareilly	True positives	Bareilly-II	exact assigned
SRR6480947	Bareilly	19	Bareilly	True positives	Bareilly	True positives	Bareilly-I	exact assigned
SRR6481111	Bareilly	19	Bareilly	True positives	Bareilly	True positives	Bareilly-I	exact assigned
SRR2102518	Berta	6	Berta	True positives	N/A (The predicted antigenic profile does not exist in the White-Kauffmann-Le Minor scheme)	Failed	Berta,Enteritidis-AUS	partial assigned (one or more false positives)
ERR1737348	Berta	6	Berta	True positives	Berta	True positives	Berta,Enteritidis-AUS	partial assigned (one or more false positives)
SRR3277621	Berta	6	Berta	True positives	Berta	True positives	Berta,Enteritidis-AUS	partial assigned (one or more false positives)
SRR5091698	Berta	6	Berta	True positives	Berta	True positives	Berta,Enteritidis-AUS	partial assigned (one or more false positives)
SRR5344865	Berta	6	Berta	True positives	Berta	True positives	Enteritidis-AUS,Berta	partial assigned (one or more false positives)
SRR5929602	Berta	6	Berta	True positives	Berta	True positives	Berta,Enteritidis-AUS	partial assigned (one or more false positives)
SRR3185064	Bispebjerg	1	Bispebjerg	True positives	II [1],4,[5],12,[27]:a:e,n,x or Bispebjerg*	Failed	Bispebjerg	exact assigned
SRR3497866	Bonariensis	2	Bonariensis	True positives	Bonariensis	True positives	Bonariensis	exact assigned
SRR6799054	Bonariensis	2	Bonariensis	True positives	Bonariensis	True positives	Bonariensis	exact assigned
ERR1714832	Bovismorbificans	8	Bovismorbificans	True positives	Hindmarsh or Bovismorbificans*	True positives	Bovismorbificans-I	exact assigned
ERR1824573	Bovismorbificans	8	Bovismorbificans	True positives	Hindmarsh or Bovismorbificans*	True positives	Bovismorbificans-I	exact assigned
SRR1060495	Bovismorbificans	8	Bovismorbificans	True positives	Hindmarsh or Bovismorbificans*	True positives	Bovismorbificans-I	exact assigned
SRR1966849	Bovismorbificans	8	Bovismorbificans	True positives	Hindmarsh or Bovismorbificans*	True positives	Bovismorbificans-I	exact assigned
SRR4449989	Bovismorbificans	8	Bovismorbificans	True positives	Hindmarsh or Bovismorbificans*	True positives	Bovismorbificans-I	exact assigned
SRR5278335	Bovismorbificans	8	Bovismorbificans	True positives	Hindmarsh or Bovismorbificans*	True positives	Bovismorbificans-I	exact assigned
SRR5419260	Bovismorbificans	8	Bovismorbificans	True positives	Hindmarsh or Bovismorbificans*	True positives	Bovismorbificans-I	exact assigned
SRR6766080	Bovismorbificans	8	Bovismorbificans	True positives	Hindmarsh or Bovismorbificans*	True positives	Bovismorbificans-I	exact assigned
SRR3341038	Braenderup	14	Larochelle	Failed	Larochelle	Failed	Braenderup	exact assigned
ERR1046256	Braenderup	14	Braenderup	True positives	N/A (The predicted antigenic profile does not exist in the White-Kauffmann-Le Minor scheme)	Failed	Braenderup	exact assigned
SRR4044606	Braenderup	14	Braenderup	True positives	N/A (The predicted antigenic profile does not exist in the White-Kauffmann-Le Minor scheme)	Failed	Braenderup	exact assigned
SRR5812012	Braenderup	14	Braenderup	True positives	N/A (The predicted antigenic profile does not exist in the White-Kauffmann-Le Minor scheme)	Failed	Braenderup	exact assigned
SRR6254915	Braenderup	14	Braenderup	True positives	N/A (The predicted antigenic profile does not exist in the White-Kauffmann-Le Minor scheme)	Failed	Braenderup	exact assigned
ERR212588	Braenderup	14	Braenderup	True positives	Braenderup	True positives	Braenderup	exact assigned
SRR1233940	Braenderup	14	Braenderup	True positives	Braenderup	True positives	Braenderup	exact assigned
SRR1965161	Braenderup	14	Braenderup	True positives	Braenderup	True positives	Braenderup	exact assigned
SRR1966290	Braenderup	14	Braenderup	True positives	Braenderup	True positives	Braenderup	exact assigned
SRR3225390	Braenderup	14	Braenderup	True positives	Braenderup	True positives	Braenderup	exact assigned
SRR3605738	Braenderup	14	Braenderup	True positives	Braenderup	True positives	Braenderup	exact assigned
SRR3933011	Braenderup	14	Braenderup	True positives	Braenderup	True positives	Braenderup	exact assigned
SRR5110522	Braenderup	14	Braenderup	True positives	Braenderup	True positives	Braenderup	exact assigned
SRR5725227	Braenderup	14	Braenderup	True positives	Braenderup	True positives	Braenderup	exact assigned
SRR4427828	Brandenburg	4	Brandenburg	True positives	Brandenburg	True positives	Bonariensis	Failed
ERR2001751	Brandenburg	4	Brandenburg	True positives	Brandenburg	True positives	Brandenburg	exact assigned
SRR1816450	Brandenburg	4	Brandenburg	True positives	Brandenburg	True positives	Brandenburg	exact assigned
SRR1967351	Brandenburg	4	Brandenburg	True positives	Brandenburg	True positives	Brandenburg	exact assigned
SRR4035037	Bredeney	2	Bredeney	True positives	Bredeney	True positives	Bredeney,Schwarzengrund	partial assigned (one or more false positives)
SRR1043943	Bredeney	2	Bredeney	True positives	Bredeney	True positives	Bredeney	exact assigned
SRR1164552	Brunei	10	Brunei	True positives	Tananarive or Brunei*	True positives	Brunei	exact assigned
SRR1481659	Brunei	10	Brunei	True positives	Tananarive or Brunei*	True positives	Brunei	exact assigned
SRR1636890	Brunei	10	Brunei	True positives	Tananarive or Brunei*	True positives	Brunei	exact assigned
SRR1653422	Brunei	10	Brunei	True positives	Tananarive or Brunei*	True positives	Brunei	exact assigned
SRR1778002	Brunei	10	Brunei	True positives	Tananarive or Brunei*	True positives	Brunei	exact assigned
SRR1793293	Brunei	10	Brunei	True positives	Tananarive or Brunei*	True positives	Brunei	exact assigned
SRR2124435	Brunei	10	Brunei	True positives	Tananarive or Brunei*	True positives	Brunei	exact assigned
SRR4093254	Brunei	10	Brunei	True positives	Tananarive or Brunei*	True positives	Brunei	exact assigned
SRR4733924	Brunei	10	Brunei	True positives	Tananarive or Brunei*	True positives	Brunei	exact assigned
SRR5121877	Brunei	10	Brunei	True positives	Tananarive or Brunei*	True positives	Brunei	exact assigned
SRR1002809	Cerro	12	Cerro	True positives	Cerro or II 18:z4,z23:- or IIIa 18:z4,z23:-*	True positives	Cerro-I,Cerro-II	exact assigned
SRR1643103	Cerro	12	Cerro	True positives	Cerro or II 18:z4,z23:- or IIIa 18:z4,z23:-*	True positives	Cerro-I,Cerro-II	exact assigned
SRR1686611	Cerro	12	Cerro	True positives	Cerro or II 18:z4,z23:- or IIIa 18:z4,z23:-*	True positives	Cerro-II	exact assigned
SRR1815067	Cerro	12	Cerro	True positives	Cerro or II 18:z4,z23:- or IIIa 18:z4,z23:-*	True positives	Cerro-II	exact assigned
SRR2136804	Cerro	12	Cerro	True positives	Cerro or II 18:z4,z23:- or IIIa 18:z4,z23:-*	True positives	Cerro-II	exact assigned
SRR4012276	Cerro	12	Cerro	True positives	Cerro or II 18:z4,z23:- or IIIa 18:z4,z23:-*	True positives	Cerro-I,Cerro-II	exact assigned
SRR4012613	Cerro	12	Cerro	True positives	Cerro or II 18:z4,z23:- or IIIa 18:z4,z23:-*	True positives	Cerro-I,Cerro-II	exact assigned
SRR4418284	Cerro	12	Cerro	True positives	Cerro or II 18:z4,z23:- or IIIa 18:z4,z23:-*	True positives	Cerro-I,Cerro-II	exact assigned
SRR5584487	Cerro	12	Cerro	True positives	Cerro or II 18:z4,z23:- or IIIa 18:z4,z23:-*	True positives	Cerro-I,Cerro-II	exact assigned
SRR5643223	Cerro	12	Cerro	True positives	Cerro or II 18:z4,z23:- or IIIa 18:z4,z23:-*	True positives	Cerro-II	exact assigned
SRR6008884	Cerro	12	Cerro	True positives	Cerro or II 18:z4,z23:- or IIIa 18:z4,z23:-*	True positives	Cerro-I	exact assigned
SRR6451530	Cerro	12	Cerro	True positives	Cerro or II 18:z4,z23:- or IIIa 18:z4,z23:-*	True positives	Cerro-I,Cerro-II	exact assigned
SRR3049042	Chester	13	Chester	True positives	Chester	True positives	London-I	Failed
ERR230412	Chester	13	Reading	Failed	Reading	Failed	Sandiego,Chester	partial assigned (one or more false positives)
SRR1045868	Chester	13	Eastbourne	Failed	Eastbourne	Failed	Sandiego,Chester	partial assigned (one or more false positives)
SRR1812872	Chester	13	Reading	Failed	Reading	Failed	Sandiego,Chester	partial assigned (one or more false positives)
SRR2096619	Chester	13	Reading	Failed	Reading	Failed	Sandiego,Chester	partial assigned (one or more false positives)
SRR5861467	Chester	13	Reading	Failed	Reading	Failed	Sandiego,Chester	partial assigned (one or more false positives)
SRR1068300	Chester	13	Chester	True positives	Chester	True positives	Sandiego,Chester	partial assigned (one or more false positives)
SRR5336149	Chester	13	Chester	True positives	Chester	True positives	Sandiego,Chester	partial assigned (one or more false positives)
SRR5585243	Chester	13	Chester	True positives	Chester	True positives	Sandiego,Chester	partial assigned (one or more false positives)
SRR5628552	Chester	13	Chester	True positives	Chester	True positives	Sandiego,Chester	partial assigned (one or more false positives)
SRR5633218	Chester	13	Chester	True positives	Chester	True positives	Chester,Sandiego	partial assigned (one or more false positives)
ERR2001743	Chester	13	Chester	True positives	Chester	True positives	Chester	exact assigned
SRR4896357	Chester	13	Chester	True positives	Chester	True positives	Chester	exact assigned
ERR1069314	Choleraesuis	4	Choleraesuis	True positives	Paratyphi C or Choleraesuis or Typhisuis*	True positives	0	Failed
ERR016915	Choleraesuis	4	Choleraesuis	True positives	N/A (The predicted antigenic profile does not exist in the White-Kauffmann-Le Minor scheme)	Failed	Choleraesuis	exact assigned
ERR1046119	Choleraesuis	4	Choleraesuis	True positives	Paratyphi C or Choleraesuis or Typhisuis*	True positives	Choleraesuis	exact assigned
ERR1891553	Choleraesuis	4	Choleraesuis	True positives	Paratyphi C or Choleraesuis or Typhisuis*	True positives	Choleraesuis	exact assigned
ERR1046226	Corvallis	2	Corvallis	True positives	Corvallis or Chailey*	True positives	Corvallis	exact assigned
SRR5043443	Corvallis	2	Corvallis	True positives	Corvallis or Chailey*	True positives	Corvallis	exact assigned
SRR1573624	Cotham	1	Cotham	True positives	N/A (The predicted antigenic profile does not exist in the White-Kauffmann-Le Minor scheme)	Failed	Cotham	exact assigned
SRR1041459	Cubana	4	Agoueve	Failed	Agoueve or Cubana*	Failed	Cubana	exact assigned
SRR1638900	Cubana	4	Cubana	True positives	Agoueve or Cubana*	True positives	Cubana	exact assigned
SRR1777695	Cubana	4	Cubana	True positives	Agoueve or Cubana*	True positives	Cubana	exact assigned
SRR5712030	Cubana	4	Cubana	True positives	Agoueve or Cubana*	True positives	Cubana	exact assigned
ERR2195780	Derby	17	Derby	True positives	Derby	True positives	Stanleyville	Failed
SRR1920208	Derby	17	Derby	True positives	Derby	True positives	Kottbus	Failed
SRR6484496	Derby	17	Derby	True positives	Derby	True positives	Stanleyville	Failed
ERR1046161	Derby	17	Derby	True positives	Derby	True positives	Derby-I&II	exact assigned
ERR1046174	Derby	17	Derby	True positives	Derby	True positives	Derby-I&II	exact assigned
ERR1714961	Derby	17	Derby	True positives	Derby	True positives	Derby-I&II	exact assigned
ERR2195720	Derby	17	Derby	True positives	Derby	True positives	Derby-I&II	exact assigned
ERR2195738	Derby	17	Derby	True positives	Derby	True positives	Derby-III	exact assigned
ERR2195749	Derby	17	Derby	True positives	Derby	True positives	Derby-I&II	exact assigned
SRR1514722	Derby	17	Derby	True positives	Derby	True positives	Derby-I&II	exact assigned
SRR1815293	Derby	17	Derby	True positives	Derby	True positives	Derby-I&II	exact assigned
SRR3214121	Derby	17	Derby	True positives	Derby	True positives	Derby-I&II	exact assigned
SRR3295665	Derby	17	Derby	True positives	Derby	True positives	Derby-I&II	exact assigned
SRR3402176	Derby	17	Derby	True positives	Derby	True positives	Derby-I&II	exact assigned
SRR3532766	Derby	17	Derby	True positives	Derby	True positives	Derby-I&II	exact assigned
SRR5412463	Derby	17	Derby	True positives	Derby	True positives	Derby-I&II	exact assigned
SRR6493467	Derby	17	Derby	True positives	Derby	True positives	Derby-I&II	exact assigned
SRR5928608	Dublin	12	Dublin	True positives	N/A (The predicted antigenic profile does not exist in the White-Kauffmann-Le Minor scheme)	Failed	0	Failed
ERR015593	Dublin	12	Dublin	True positives	N/A (The predicted antigenic profile does not exist in the White-Kauffmann-Le Minor scheme)	Failed	Dublin	exact assigned
ERR1010168	Dublin	12	Dublin	True positives	N/A (The predicted antigenic profile does not exist in the White-Kauffmann-Le Minor scheme)	Failed	Dublin	exact assigned
ERR731347	Dublin	12	Dublin	True positives	N/A (The predicted antigenic profile does not exist in the White-Kauffmann-Le Minor scheme)	Failed	Dublin	exact assigned
SRR1815386	Dublin	12	Dublin	True positives	N/A (The predicted antigenic profile does not exist in the White-Kauffmann-Le Minor scheme)	Failed	Dublin	exact assigned
ERR1201708	Dublin	12	Dublin	True positives	Dublin	True positives	Dublin	exact assigned
ERR2177177	Dublin	12	Dublin	True positives	Dublin	True positives	Dublin	exact assigned
SRR1334790	Dublin	12	Dublin	True positives	Dublin	True positives	Dublin	exact assigned
SRR1425279	Dublin	12	Dublin	True positives	Dublin	True positives	Dublin	exact assigned
SRR2567125	Dublin	12	Dublin	True positives	Dublin	True positives	Dublin	exact assigned
SRR3115988	Dublin	12	Dublin	True positives	Dublin	True positives	Dublin	exact assigned
SRR6191689	Dublin	12	Dublin	True positives	Dublin	True positives	Dublin	exact assigned
SRR1968733	Eastbourne	1	Eastbourne	True positives	Eastbourne	True positives	Eastbourne	exact assigned
SRR5238974	Enteritidis	112	Belem|Santiago	Failed	Santiago or Belem*	Failed	Kottbus	Failed
SRR6687577	Enteritidis	112	Belem|Santiago	Failed	Santiago or Belem*	Failed	Kottbus	Failed
ERR235130	Enteritidis	112	Enteritidis	True positives	N/A (The predicted antigenic profile does not exist in the White-Kauffmann-Le Minor scheme)	Failed	0	Failed
ERR744318	Enteritidis	112	Enteritidis	True positives	N/A (The predicted antigenic profile does not exist in the White-Kauffmann-Le Minor scheme)	Failed	0	Failed
ERR314337	Enteritidis	112	Enteritidis	True positives	Enteritidis or Gallinarum	True positives	0	Failed
SRR3322134	Enteritidis	112	Enteritidis	True positives	Enteritidis	True positives	0	Failed
SRR3521373	Enteritidis	112	Enteritidis	True positives	Enteritdis or Gallinarum	True positives	0	Failed
ERR369397	Enteritidis	112	Enteritidis	True positives	N/A (The predicted antigenic profile does not exist in the White-Kauffmann-Le Minor scheme)	Failed	Gallinarum,Enteritidis-calde A/C	partial assigned (one or more false positives)
SRR1534875	Enteritidis	112	Enteritidis	True positives	N/A (The predicted antigenic profile does not exist in the White-Kauffmann-Le Minor scheme)	Failed	Enteritidis-calde B,Glostrup	partial assigned (one or more false positives)
SRR1968750	Enteritidis	112	Enteritidis	True positives	N/A (The predicted antigenic profile does not exist in the White-Kauffmann-Le Minor scheme)	Failed	Litchfield,Paratyphi_A-I,Gallinarum,Enteritidis-calde A/C	partial assigned (one or more false positives)
SRR3049054	Enteritidis	112	Enteritidis	True positives	N/A (The predicted antigenic profile does not exist in the White-Kauffmann-Le Minor scheme)	Failed	Gallinarum,Enteritidis-calde A/C	partial assigned (one or more false positives)
SRR3284749	Enteritidis	112	Enteritidis	True positives	N/A (The predicted antigenic profile does not exist in the White-Kauffmann-Le Minor scheme)	Failed	Gallinarum,Enteritidis-calde A/C	partial assigned (one or more false positives)
ERR1513247	Enteritidis	112	Enteritidis	True positives	Enteritidis or Gallinarum	True positives	Gallinarum,Enteritidis-calde A/C	partial assigned (one or more false positives)
ERR2118047	Enteritidis	112	Enteritidis	True positives	Enteritidis or Gallinarum	True positives	Gallinarum,Enteritidis-calde A/C	partial assigned (one or more false positives)
ERR2118068	Enteritidis	112	Enteritidis	True positives	Enteritidis or Gallinarum	True positives	Enteritidis-calde A/C,Berta	partial assigned (one or more false positives)
ERR304857	Enteritidis	112	Enteritidis	True positives	Enteritidis or Gallinarum	True positives	Gallinarum,Enteritidis-calde A/C	partial assigned (one or more false positives)
SRR1002825	Enteritidis	112	Enteritidis	True positives	Enteritdis or Gallinarum	True positives	Gallinarum,Enteritidis-calde A/C	partial assigned (one or more false positives)
SRR1967712	Enteritidis	112	Enteritidis	True positives	Enteritdis or Gallinarum	True positives	Gallinarum,Enteritidis-calde A/C	partial assigned (one or more false positives)
SRR5193418	Enteritidis	112	Enteritidis	True positives	Enteritidis	True positives	Gallinarum,Enteritidis-calde A/C	partial assigned (one or more false positives)
SRR5220891	Enteritidis	112	Enteritidis	True positives	Enteritdis or Gallinarum	True positives	Gallinarum,Enteritidis-calde A/C	partial assigned (one or more false positives)
SRR5583124	Enteritidis	112	Enteritidis	True positives	Enteritdis or Gallinarum	True positives	Gallinarum,Enteritidis-calde A/C	partial assigned (one or more false positives)
SRR5757187	Enteritidis	112	Enteritidis	True positives	Enteritdis or Gallinarum	True positives	Gallinarum,Enteritidis-calde A/C	partial assigned (one or more false positives)
SRR6650720	Enteritidis	112	Enteritidis	True positives	Enteritdis or Gallinarum	True positives	Gallinarum,Enteritidis-calde A/C	partial assigned (one or more false positives)
ERR024949	Enteritidis	112	Enteritidis	True positives	N/A (The predicted antigenic profile does not exist in the White-Kauffmann-Le Minor scheme)	Failed	Enteritidis-calde B	exact assigned
ERR025166	Enteritidis	112	Enteritidis	True positives	N/A (The predicted antigenic profile does not exist in the White-Kauffmann-Le Minor scheme)	Failed	Enteritidis-calde B	exact assigned
ERR1556228	Enteritidis	112	Enteritidis	True positives	N/A (The predicted antigenic profile does not exist in the White-Kauffmann-Le Minor scheme)	Failed	Enteritidis-calde B	exact assigned
ERR197445	Enteritidis	112	Enteritidis	True positives	N/A (The predicted antigenic profile does not exist in the White-Kauffmann-Le Minor scheme)	Failed	Enteritidis-calde B	exact assigned
ERR314302	Enteritidis	112	Enteritidis	True positives	N/A (The predicted antigenic profile does not exist in the White-Kauffmann-Le Minor scheme)	Failed	Enteritidis-calde B	exact assigned
ERR338305	Enteritidis	112	Enteritidis	True positives	N/A (The predicted antigenic profile does not exist in the White-Kauffmann-Le Minor scheme)	Failed	Enteritidis-calde B	exact assigned
ERR374237	Enteritidis	112	Enteritidis	True positives	N/A (The predicted antigenic profile does not exist in the White-Kauffmann-Le Minor scheme)	Failed	Enteritidis-calde B	exact assigned
ERR405397	Enteritidis	112	Enteritidis	True positives	N/A (The predicted antigenic profile does not exist in the White-Kauffmann-Le Minor scheme)	Failed	Enteritidis-calde B	exact assigned
ERR998598	Enteritidis	112	Enteritidis	True positives	N/A (The predicted antigenic profile does not exist in the White-Kauffmann-Le Minor scheme)	Failed	Enteritidis-calde B	exact assigned
SRR1645961	Enteritidis	112	Enteritidis	True positives	N/A (The predicted antigenic profile does not exist in the White-Kauffmann-Le Minor scheme)	Failed	Enteritidis-calde B	exact assigned
SRR1963335	Enteritidis	112	Enteritidis	True positives	N/A (The predicted antigenic profile does not exist in the White-Kauffmann-Le Minor scheme)	Failed	Enteritidis-calde B	exact assigned
SRR1965671	Enteritidis	112	Enteritidis	True positives	N/A (The predicted antigenic profile does not exist in the White-Kauffmann-Le Minor scheme)	Failed	Enteritidis-calde B	exact assigned
SRR3930211	Enteritidis	112	Enteritidis	True positives	N/A (The predicted antigenic profile does not exist in the White-Kauffmann-Le Minor scheme)	Failed	Enteritidis-calde B	exact assigned
SRR5149186	Enteritidis	112	Enteritidis	True positives	N/A (The predicted antigenic profile does not exist in the White-Kauffmann-Le Minor scheme)	Failed	Enteritidis-calde B	exact assigned
SRR5220425	Enteritidis	112	Enteritidis	True positives	N/A (The predicted antigenic profile does not exist in the White-Kauffmann-Le Minor scheme)	Failed	Enteritidis-calde B	exact assigned
SRR5388859	Enteritidis	112	Enteritidis	True positives	N/A (The predicted antigenic profile does not exist in the White-Kauffmann-Le Minor scheme)	Failed	Enteritidis-calde B	exact assigned
SRR5460954	Enteritidis	112	Enteritidis	True positives	N/A (The predicted antigenic profile does not exist in the White-Kauffmann-Le Minor scheme)	Failed	Enteritidis-calde B	exact assigned
SRR5850019	Enteritidis	112	Enteritidis	True positives	N/A (The predicted antigenic profile does not exist in the White-Kauffmann-Le Minor scheme)	Failed	Enteritidis-calde B	exact assigned
ERR1755150	Enteritidis	112	Enteritidis	True positives	Enteritidis	True positives	Enteritidis-calde B	exact assigned
ERR197418	Enteritidis	112	Enteritidis	True positives	Enteritidis	True positives	Enteritidis-calde B	exact assigned
ERR197423	Enteritidis	112	Enteritidis	True positives	Enteritidis	True positives	Enteritidis-calde B	exact assigned
ERR235180	Enteritidis	112	Enteritidis	True positives	Enteritidis	True positives	Enteritidis-calde B	exact assigned
ERR235187	Enteritidis	112	Enteritidis	True positives	Enteritidis	True positives	Enteritidis-calde B	exact assigned
ERR235292	Enteritidis	112	Enteritidis	True positives	Enteritidis	True positives	Enteritidis-calde B	exact assigned
ERR331213	Enteritidis	112	Enteritidis	True positives	Enteritidis	True positives	Enteritidis-calde B	exact assigned
SRR1132891	Enteritidis	112	Enteritidis	True positives	Enteritidis	True positives	Enteritidis-calde B	exact assigned
SRR1187407	Enteritidis	112	Enteritidis	True positives	Enteritidis or Gallinarum	True positives	Enteritidis-calde B	exact assigned
SRR1220800	Enteritidis	112	Enteritidis	True positives	Enteritidis	True positives	Enteritidis-calde B	exact assigned
SRR1346300	Enteritidis	112	Enteritidis	True positives	Enteritidis	True positives	Enteritidis-calde B	exact assigned
SRR1379770	Enteritidis	112	Enteritidis	True positives	Enteritidis	True positives	Enteritidis-calde B	exact assigned
SRR1536831	Enteritidis	112	Enteritidis	True positives	Enteritidis	True positives	Enteritidis-calde B	exact assigned
SRR1616818	Enteritidis	112	Enteritidis	True positives	Enteritidis	True positives	Enteritidis-calde B	exact assigned
SRR1645579	Enteritidis	112	Enteritidis	True positives	Enteritidis	True positives	Enteritidis-calde B	exact assigned
SRR1646099	Enteritidis	112	Enteritidis	True positives	Enteritidis	True positives	Enteritidis-calde B	exact assigned
SRR1765787	Enteritidis	112	Enteritidis	True positives	Enteritidis	True positives	Enteritidis-calde B	exact assigned
SRR1946847	Enteritidis	112	Enteritidis	True positives	Enteritidis	True positives	Enteritidis-calde B	exact assigned
SRR1958517	Enteritidis	112	Enteritidis	True positives	Enteritidis	True positives	Enteritidis-calde B	exact assigned
SRR1958560	Enteritidis	112	Enteritidis	True positives	Enteritidis	True positives	Enteritidis-calde B	exact assigned
SRR1965336	Enteritidis	112	Enteritidis	True positives	Enteritidis	True positives	Enteritidis-calde B	exact assigned
SRR1966277	Enteritidis	112	Enteritidis	True positives	Enteritidis	True positives	Enteritidis-calde B	exact assigned
SRR1966974	Enteritidis	112	Enteritidis	True positives	Enteritidis	True positives	Enteritidis-calde B	exact assigned
SRR1967550	Enteritidis	112	Enteritidis	True positives	Enteritidis	True positives	Enteritidis-calde B	exact assigned
SRR1967878	Enteritidis	112	Enteritidis	True positives	Enteritidis	True positives	Enteritidis-calde B	exact assigned
SRR1969583	Enteritidis	112	Enteritidis	True positives	Enteritidis	True positives	Enteritidis-calde B	exact assigned
SRR1969665	Enteritidis	112	Enteritidis	True positives	Enteritidis	True positives	Enteritidis-calde B	exact assigned
SRR1995741	Enteritidis	112	Enteritidis	True positives	Enteritidis	True positives	Enteritidis-calde B	exact assigned
SRR2015080	Enteritidis	112	Enteritidis	True positives	Enteritidis	True positives	Enteritidis-calde B	exact assigned
SRR2095391	Enteritidis	112	Enteritidis	True positives	Enteritidis	True positives	Enteritidis-calde B	exact assigned
SRR2124343	Enteritidis	112	Enteritidis	True positives	Enteritidis	True positives	Enteritidis-calde B	exact assigned
SRR2176222	Enteritidis	112	Enteritidis	True positives	Enteritidis	True positives	Enteritidis-calde B	exact assigned
SRR2194265	Enteritidis	112	Enteritidis	True positives	Enteritidis	True positives	Enteritidis-calde B	exact assigned
SRR2194499	Enteritidis	112	Enteritidis	True positives	Enteritidis	True positives	Enteritidis-calde B	exact assigned
SRR2352201	Enteritidis	112	Enteritidis	True positives	Enteritidis	True positives	Enteritidis-calde B	exact assigned
SRR3052031	Enteritidis	112	Enteritidis	True positives	Enteritidis	True positives	Enteritidis-calde B	exact assigned
SRR3085566	Enteritidis	112	Enteritidis	True positives	Enteritidis	True positives	Enteritidis-calde B	exact assigned
SRR3223812	Enteritidis	112	Enteritidis	True positives	Enteritidis	True positives	Enteritidis-calde B	exact assigned
SRR3286941	Enteritidis	112	Enteritidis	True positives	Enteritidis	True positives	Enteritidis-calde B	exact assigned
SRR3585348	Enteritidis	112	Enteritidis	True positives	Enteritidis	True positives	Enteritidis-calde B	exact assigned
SRR3667814	Enteritidis	112	Enteritidis	True positives	Enteritidis	True positives	Enteritidis-calde B	exact assigned
SRR3676331	Enteritidis	112	Enteritidis	True positives	Enteritidis	True positives	Enteritidis-calde B	exact assigned
SRR3948504	Enteritidis	112	Enteritidis	True positives	Enteritidis	True positives	Enteritidis-calde B	exact assigned
SRR4293084	Enteritidis	112	Enteritidis	True positives	Enteritidis	True positives	Enteritidis-calde B	exact assigned
SRR5023263	Enteritidis	112	Enteritidis	True positives	Enteritidis	True positives	Enteritidis-calde B	exact assigned
SRR5063209	Enteritidis	112	Enteritidis	True positives	Enteritidis	True positives	Enteritidis-calde B	exact assigned
SRR5064776	Enteritidis	112	Enteritidis	True positives	Enteritidis	True positives	Enteritidis-calde B	exact assigned
SRR5160325	Enteritidis	112	Enteritidis	True positives	Enteritidis	True positives	Enteritidis-calde B	exact assigned
SRR5193469	Enteritidis	112	Enteritidis	True positives	Enteritidis	True positives	Enteritidis-calde B	exact assigned
SRR5193538	Enteritidis	112	Enteritidis	True positives	Enteritidis	True positives	Enteritidis-calde B	exact assigned
SRR5193760	Enteritidis	112	Enteritidis	True positives	Enteritidis	True positives	Enteritidis-calde B	exact assigned
SRR5193773	Enteritidis	112	Enteritidis	True positives	Enteritidis	True positives	Enteritidis-calde B	exact assigned
SRR5193806	Enteritidis	112	Enteritidis	True positives	Enteritidis	True positives	Enteritidis-calde B	exact assigned
SRR5201417	Enteritidis	112	Enteritidis	True positives	Enteritidis	True positives	Enteritidis-calde B	exact assigned
SRR5216126	Enteritidis	112	Enteritidis	True positives	Enteritidis	True positives	Enteritidis-calde B	exact assigned
SRR5216284	Enteritidis	112	Enteritidis	True positives	Enteritidis	True positives	Enteritidis-calde B	exact assigned
SRR5216553	Enteritidis	112	Enteritidis	True positives	Enteritidis	True positives	Enteritidis-calde B	exact assigned
SRR5220459	Enteritidis	112	Enteritidis	True positives	Enteritidis	True positives	Enteritidis-calde B	exact assigned
SRR5240722	Enteritidis	112	Enteritidis	True positives	Enteritidis	True positives	Enteritidis-calde B	exact assigned
SRR5244575	Enteritidis	112	Enteritidis	True positives	Enteritdis or Gallinarum	True positives	Enteritidis-calde B	exact assigned
SRR5361092	Enteritidis	112	Enteritidis	True positives	Enteritidis	True positives	Enteritidis-calde B	exact assigned
SRR5361192	Enteritidis	112	Enteritidis	True positives	Enteritidis	True positives	Enteritidis-calde B	exact assigned
SRR5364288	Enteritidis	112	Enteritidis	True positives	Enteritidis	True positives	Enteritidis-calde B	exact assigned
SRR5365219	Enteritidis	112	Enteritidis	True positives	Enteritidis	True positives	Enteritidis-calde B	exact assigned
SRR5387111	Enteritidis	112	Enteritidis	True positives	Enteritidis	True positives	Enteritidis-calde B	exact assigned
SRR5574862	Enteritidis	112	Enteritidis	True positives	Enteritidis	True positives	Enteritidis-calde B	exact assigned
SRR5633373	Enteritidis	112	Enteritidis	True positives	Enteritidis	True positives	Enteritidis-calde B	exact assigned
SRR5677860	Enteritidis	112	Enteritidis	True positives	Enteritidis	True positives	Enteritidis-calde B	exact assigned
SRR6132045	Enteritidis	112	Enteritidis	True positives	Enteritidis	True positives	Enteritidis-calde B	exact assigned
SRR6351036	Enteritidis	112	Enteritidis	True positives	Enteritidis	True positives	Enteritidis-calde B	exact assigned
SRR6489959	Enteritidis	112	Enteritidis	True positives	Enteritidis	True positives	Enteritidis-calde B	exact assigned
SRR6686696	Florida	3	Florida	True positives	Midway or Florida*	True positives	Teko,Kisarawe	Failed
SRR3713640	Florida	3	Florida	True positives	Midway or Florida*	True positives	Florida	exact assigned
SRR5000190	Florida	3	Florida	True positives	Midway or Florida*	True positives	Florida	exact assigned
ERR046511	Gallinarum	3	Gallinarum	True positives	N/A (The predicted antigenic profile does not exist in the White-Kauffmann-Le Minor scheme)	Failed	Gallinarum,Enteritidis-AUS	partial assigned (one or more false positives)
ERR314371	Gallinarum	3	Gallinarum	True positives	N/A (The predicted antigenic profile does not exist in the White-Kauffmann-Le Minor scheme)	Failed	Gallinarum,Enteritidis-AUS	partial assigned (one or more false positives)
ERR405657	Gallinarum	3	Gallinarum	True positives	N/A (The predicted antigenic profile does not exist in the White-Kauffmann-Le Minor scheme)	Failed	Gallinarum,Enteritidis-AUS	partial assigned (one or more false positives)
SRR1048260	Gaminara	8	Gaminara	True positives	Gaminara	True positives	Gaminara	exact assigned
SRR1177615	Gaminara	8	Gaminara	True positives	Gaminara	True positives	Gaminara	exact assigned
SRR1282400	Gaminara	8	Gaminara	True positives	Gaminara	True positives	Gaminara	exact assigned
SRR2075036	Gaminara	8	Gaminara	True positives	Gaminara	True positives	Gaminara	exact assigned
SRR2104598	Gaminara	8	Gaminara	True positives	Gaminara	True positives	Gaminara	exact assigned
SRR2981193	Gaminara	8	Gaminara	True positives	Gaminara	True positives	Gaminara	exact assigned
SRR3039659	Gaminara	8	Gaminara	True positives	Gaminara	True positives	Gaminara	exact assigned
SRR5361540	Gaminara	8	Gaminara	True positives	Gaminara	True positives	Gaminara	exact assigned
SRR4012592	Give	11	Give	True positives	Give	True positives	Give-I&II,Schwarzengrund	partial assigned (one or more false positives)
ERR1046232	Give	11	Give	True positives	Give	True positives	Give-I&II	exact assigned
ERR998552	Give	11	Give	True positives	Give	True positives	Give-I&II	exact assigned
SRR1106369	Give	11	Give	True positives	Give	True positives	Give-I&II	exact assigned
SRR1583128	Give	11	Give	True positives	Give	True positives	Give-I&II	exact assigned
SRR1720460	Give	11	Give	True positives	Give	True positives	Give-I&II	exact assigned
SRR1840696	Give	11	Give	True positives	Give	True positives	Give-I&II	exact assigned
SRR2005922	Give	11	Give	True positives	Give	True positives	Give-I&II	exact assigned
SRR5229162	Give	11	Give	True positives	Give	True positives	Give-I&II	exact assigned
SRR5632153	Give	11	Give	True positives	Give	True positives	Give-I&II	exact assigned
SRR6286511	Give	11	Give	True positives	Give	True positives	Give-I&II	exact assigned
ERR998560	Glostrup	3	Hadar|Istanbul	Failed	Hadar or Istanbul*	Failed	Havana-II	Failed
SRR1698186	Glostrup	3	Glostrup	True positives	Glostrup or Chomedey*	True positives	Glostrup	exact assigned
SRR1968391	Glostrup	3	Glostrup	True positives	Glostrup or Chomedey*	True positives	Glostrup	exact assigned
SRR1965191	Goldcoast	3	Goldcoast	True positives	Goldcoast or Brikama*	True positives	Goldcoast	exact assigned
SRR1965309	Goldcoast	3	Goldcoast	True positives	Goldcoast or Brikama*	True positives	Goldcoast	exact assigned
SRR3933551	Goldcoast	3	Goldcoast	True positives	Goldcoast or Brikama*	True positives	Goldcoast	exact assigned
ERR1046177	Hadar	7	Hadar	True positives	Hadar or Istanbul*	True positives	Hadar	exact assigned
ERR212587	Hadar	7	Hadar	True positives	Hadar or Istanbul*	True positives	Hadar	exact assigned
SRR1021815	Hadar	7	Hadar	True positives	Hadar or Istanbul*	True positives	Hadar	exact assigned
SRR1577663	Hadar	7	Hadar	True positives	Hadar or Istanbul*	True positives	Hadar	exact assigned
SRR2567040	Hadar	7	Hadar	True positives	Hadar or Istanbul*	True positives	Hadar	exact assigned
SRR3321996	Hadar	7	Hadar	True positives	Hadar or Istanbul*	True positives	Hadar	exact assigned
SRR3664978	Hadar	7	Hadar	True positives	Hadar or Istanbul*	True positives	Hadar	exact assigned
SRR1067645	Hartford	7	Hartford	True positives	Hartford	True positives	Hartford	exact assigned
SRR2890096	Hartford	7	Hartford	True positives	Hartford	True positives	Hartford	exact assigned
SRR2910645	Hartford	7	Hartford	True positives	Hartford	True positives	Hartford	exact assigned
SRR4012356	Hartford	7	Hartford	True positives	Hartford	True positives	Hartford	exact assigned
SRR5864394	Hartford	7	Hartford	True positives	Hartford	True positives	Hartford	exact assigned
SRR5890339	Hartford	7	Hartford	True positives	Hartford	True positives	Hartford	exact assigned
SRR6028823	Hartford	7	Hartford	True positives	Hartford	True positives	Hartford	exact assigned
SRR1105691	Havana	6	Havana	True positives	N/A (The predicted antigenic profile does not exist in the White-Kauffmann-Le Minor scheme)	Failed	Havana-I	exact assigned
SRR1106488	Havana	6	Havana	True positives	Havana	True positives	Havana-II,Havana-I	exact assigned
SRR1212213	Havana	6	Havana	True positives	Havana	True positives	Havana-I	exact assigned
SRR1503330	Havana	6	Havana	True positives	Havana	True positives	Havana-I	exact assigned
SRR1593422	Havana	6	Havana	True positives	Havana	True positives	Havana-I	exact assigned
SRR3229339	Havana	6	Havana	True positives	Havana	True positives	Havana-I	exact assigned
SRR1946969	Heidelberg	9	Heidelberg	True positives	Heidelberg	True positives	Stanleyville	Failed
ERR1759154	Heidelberg	9	Heidelberg	True positives	Heidelberg	True positives	Heidelberg-I	exact assigned
ERR467123	Heidelberg	9	Heidelberg	True positives	Heidelberg	True positives	Heidelberg-II	exact assigned
SRR1060532	Heidelberg	9	Heidelberg	True positives	Heidelberg	True positives	Heidelberg-I	exact assigned
SRR1583119	Heidelberg	9	Heidelberg	True positives	Heidelberg	True positives	Heidelberg-I	exact assigned
SRR1816140	Heidelberg	9	Heidelberg	True positives	Heidelberg	True positives	Heidelberg-I	exact assigned
SRR2040616	Heidelberg	9	Heidelberg	True positives	Heidelberg	True positives	Heidelberg-II	exact assigned
SRR5230327	Heidelberg	9	Heidelberg	True positives	Heidelberg	True positives	Heidelberg-I	exact assigned
SRR5236378	Heidelberg	9	Heidelberg	True positives	Heidelberg	True positives	Heidelberg-I	exact assigned
SRR1033504	Hvittingfoss	6	Hvittingfoss	True positives	II 16:b:e,n,x or Hvittingfoss*	True positives	Hvittingfoss-III,Hvittingfoss-I&II	exact assigned
SRR1139508	Hvittingfoss	6	Hvittingfoss	True positives	II 16:b:e,n,x or Hvittingfoss*	True positives	Hvittingfoss-I&II	exact assigned
SRR1821281	Hvittingfoss	6	Hvittingfoss	True positives	II 16:b:e,n,x or Hvittingfoss*	True positives	Hvittingfoss-I&II	exact assigned
SRR3185219	Hvittingfoss	6	Hvittingfoss	True positives	II 16:b:e,n,x or Hvittingfoss*	True positives	Hvittingfoss-I&II	exact assigned
SRR3642958	Hvittingfoss	6	Hvittingfoss	True positives	II 16:b:e,n,x or Hvittingfoss*	True positives	Hvittingfoss-I&II	exact assigned
SRR5244405	Hvittingfoss	6	Hvittingfoss	True positives	II 16:b:e,n,x or Hvittingfoss*	True positives	Hvittingfoss-I&II	exact assigned
ERR1046199	Indiana	5	Indiana	True positives	Indiana or II 4,12:z:1,7*	True positives	Indiana	exact assigned
SRR1957725	Indiana	5	Indiana	True positives	Indiana or II 4,12:z:1,7*	True positives	Indiana	exact assigned
SRR1968815	Indiana	5	Indiana	True positives	Indiana or II 4,12:z:1,7*	True positives	Indiana	exact assigned
SRR3049034	Indiana	5	Indiana	True positives	Indiana or II 4,12:z:1,7*	True positives	Indiana	exact assigned
SRR3930218	Indiana	5	Indiana	True positives	Indiana or II 4,12:z:1,7*	True positives	Indiana	exact assigned
SRR1959483	Infantis	22	Infantis	True positives	N/A (The predicted antigenic profile does not exist in the White-Kauffmann-Le Minor scheme)	Failed	Infantis	exact assigned
SRR6158724	Infantis	22	Infantis	True positives	N/A (The predicted antigenic profile does not exist in the White-Kauffmann-Le Minor scheme)	Failed	Infantis	exact assigned
DRR021404	Infantis	22	Infantis	True positives	Infantis	True positives	Infantis	exact assigned
DRR022768	Infantis	22	Infantis	True positives	Infantis	True positives	Infantis	exact assigned
ERR1714888	Infantis	22	Infantis	True positives	Infantis	True positives	Infantis	exact assigned
ERR1714919	Infantis	22	Infantis	True positives	Infantis	True positives	Infantis	exact assigned
ERR235268	Infantis	22	Infantis	True positives	Infantis	True positives	Infantis	exact assigned
SRR1002834	Infantis	22	Infantis	True positives	Infantis	True positives	Infantis	exact assigned
SRR1249088	Infantis	22	Infantis	True positives	Infantis	True positives	Infantis	exact assigned
SRR1693408	Infantis	22	Infantis	True positives	Infantis	True positives	Infantis	exact assigned
SRR2082954	Infantis	22	Infantis	True positives	Infantis	True positives	Infantis	exact assigned
SRR2086970	Infantis	22	Infantis	True positives	Infantis	True positives	Infantis	exact assigned
SRR2407764	Infantis	22	Infantis	True positives	Infantis	True positives	Infantis	exact assigned
SRR3295639	Infantis	22	Infantis	True positives	Infantis	True positives	Infantis	exact assigned
SRR4774226	Infantis	22	Infantis	True positives	Infantis	True positives	Infantis	exact assigned
SRR5093736	Infantis	22	Infantis	True positives	Infantis	True positives	Infantis	exact assigned
SRR5184236	Infantis	22	Infantis	True positives	Infantis	True positives	Infantis	exact assigned
SRR5221450	Infantis	22	Infantis	True positives	Infantis	True positives	Infantis	exact assigned
SRR5496038	Infantis	22	Infantis	True positives	Infantis	True positives	Infantis	exact assigned
SRR6193029	Infantis	22	Infantis	True positives	Infantis	True positives	Infantis	exact assigned
SRR6233883	Infantis	22	Infantis	True positives	Infantis	True positives	Infantis	exact assigned
SRR6386496	Infantis	22	Infantis	True positives	Infantis	True positives	Infantis	exact assigned
SRR1021929	Inverness	12	Inverness	True positives	N/A (The predicted antigenic profile does not exist in the White-Kauffmann-Le Minor scheme)	Failed	Inverness,Johannesburg	partial assigned (one or more false positives)
SRR1288384	Inverness	12	Inverness	True positives	N/A (The predicted antigenic profile does not exist in the White-Kauffmann-Le Minor scheme)	Failed	Inverness	exact assigned
SRR2049555	Inverness	12	Inverness	True positives	Aqua	Failed	Inverness	exact assigned
SRR2086566	Inverness	12	Inverness	True positives	N/A (The predicted antigenic profile does not exist in the White-Kauffmann-Le Minor scheme)	Failed	Inverness	exact assigned
SRR1021938	Inverness	12	Inverness	True positives	Inverness	True positives	Inverness	exact assigned
SRR1586568	Inverness	12	Inverness	True positives	Inverness	True positives	Inverness	exact assigned
SRR1744056	Inverness	12	Inverness	True positives	Inverness	True positives	Inverness	exact assigned
SRR1753705	Inverness	12	Inverness	True positives	Inverness	True positives	Inverness	exact assigned
SRR1973839	Inverness	12	Inverness	True positives	Inverness	True positives	Inverness	exact assigned
SRR3765207	Inverness	12	Inverness	True positives	Inverness	True positives	Inverness	exact assigned
SRR5366739	Inverness	12	Inverness	True positives	Inverness	True positives	Inverness	exact assigned
SRR5366844	Inverness	12	Inverness	True positives	Inverness	True positives	Inverness	exact assigned
ERR230467	Javiana	28	Eastbourne|Waedenswil	Failed	Eastbourne	Failed	Javiana,Lexington	partial assigned (one or more false positives)
ERR2124053	Javiana	28	Panama	Failed	II 9,12:l,z28:1,5 or Javiana*	Failed	Javiana	exact assigned
SRR1965652	Javiana	28	Javiana	True positives	N/A (The predicted antigenic profile does not exist in the White-Kauffmann-Le Minor scheme)	Failed	Javiana	exact assigned
SRR1996188	Javiana	28	Javiana	True positives	N/A (The predicted antigenic profile does not exist in the White-Kauffmann-Le Minor scheme)	Failed	Javiana	exact assigned
SRR4295030	Javiana	28	Javiana	True positives	N/A (The predicted antigenic profile does not exist in the White-Kauffmann-Le Minor scheme)	Failed	Javiana	exact assigned
SRR1033572	Javiana	28	Javiana	True positives	II 9,12:l,z28:1,5 or Javiana*	True positives	Javiana	exact assigned
SRR1105673	Javiana	28	Javiana	True positives	II 9,12:l,z28:1,5 or Javiana*	True positives	Javiana	exact assigned
SRR1212351	Javiana	28	Javiana	True positives	II 9,12:l,z28:1,5 or Javiana*	True positives	Javiana	exact assigned
SRR1509381	Javiana	28	Javiana	True positives	II 9,12:l,z28:1,5 or Javiana*	True positives	Javiana	exact assigned
SRR1569671	Javiana	28	Javiana	True positives	II 9,12:l,z28:1,5 or Javiana*	True positives	Javiana	exact assigned
SRR1693279	Javiana	28	Javiana	True positives	II 9,12:l,z28:1,5 or Javiana*	True positives	Javiana	exact assigned
SRR1769379	Javiana	28	Javiana	True positives	II 9,12:l,z28:1,5 or Javiana*	True positives	Javiana	exact assigned
SRR1824461	Javiana	28	Javiana	True positives	II 9,12:l,z28:1,5 or Javiana*	True positives	Javiana	exact assigned
SRR1840727	Javiana	28	Javiana	True positives	II 9,12:l,z28:1,5 or Javiana*	True positives	Javiana	exact assigned
SRR1957896	Javiana	28	Javiana	True positives	II 9,12:l,z28:1,5 or Javiana*	True positives	Javiana	exact assigned
SRR1966983	Javiana	28	Javiana	True positives	II 9,12:l,z28:1,5 or Javiana*	True positives	Javiana	exact assigned
SRR2905847	Javiana	28	Javiana	True positives	II 9,12:l,z28:1,5 or Javiana*	True positives	Javiana	exact assigned
SRR2925149	Javiana	28	Javiana	True positives	II 9,12:l,z28:1,5 or Javiana*	True positives	Javiana	exact assigned
SRR3933155	Javiana	28	Javiana	True positives	II 9,12:l,z28:1,5 or Javiana*	True positives	Javiana	exact assigned
SRR4414101	Javiana	28	Javiana	True positives	II 9,12:l,z28:1,5 or Javiana*	True positives	Javiana	exact assigned
SRR5238157	Javiana	28	Javiana	True positives	II 9,12:l,z28:1,5 or Javiana*	True positives	Javiana	exact assigned
SRR5364283	Javiana	28	Javiana	True positives	II 9,12:l,z28:1,5 or Javiana*	True positives	Javiana	exact assigned
SRR5876914	Javiana	28	Javiana	True positives	II 9,12:l,z28:1,5 or Javiana*	True positives	Javiana	exact assigned
SRR5909493	Javiana	28	Javiana	True positives	II 9,12:l,z28:1,5 or Javiana*	True positives	Javiana	exact assigned
SRR6325198	Javiana	28	Javiana	True positives	II 9,12:l,z28:1,5 or Javiana*	True positives	Javiana	exact assigned
SRR6514386	Javiana	28	Javiana	True positives	II 9,12:l,z28:1,5 or Javiana*	True positives	Javiana	exact assigned
SRR6514796	Javiana	28	Javiana	True positives	II 9,12:l,z28:1,5 or Javiana*	True positives	Javiana	exact assigned
SRR6813672	Javiana	28	Javiana	True positives	II 9,12:l,z28:1,5 or Javiana*	True positives	Javiana	exact assigned
SRR1158134	Johannesburg	3	Urbana	Failed	Urbana	Failed	0	Failed
SRR5189067	Johannesburg	3	Urbana	Failed	Urbana	Failed	Glostrup	Failed
ERR998553	Johannesburg	3	Johannesburg	True positives	Johannesburg	True positives	Johannesburg	exact assigned
ERR1251807	Kedougou	2	Kedougou	True positives	Kedougou	True positives	Kedougou	exact assigned
SRR1778003	Kedougou	2	Kedougou	True positives	Kedougou	True positives	Kedougou	exact assigned
ERR1714726	Kentucky	21	Kentucky	True positives	Kentucky	True positives	Kentucky-I	exact assigned
ERR1714751	Kentucky	21	Kentucky	True positives	Kentucky	True positives	Kentucky-II	exact assigned
SRR1002840	Kentucky	21	Kentucky	True positives	Kentucky	True positives	Kentucky-I	exact assigned
SRR1106146	Kentucky	21	Kentucky	True positives	Kentucky	True positives	Kentucky-I	exact assigned
SRR1207471	Kentucky	21	Kentucky	True positives	Kentucky	True positives	Kentucky-I	exact assigned
SRR1213773	Kentucky	21	Kentucky	True positives	Kentucky	True positives	Kentucky-I	exact assigned
SRR1796054	Kentucky	21	Kentucky	True positives	Kentucky	True positives	Kentucky-I	exact assigned
SRR1958439	Kentucky	21	Kentucky	True positives	Kentucky	True positives	Kentucky-I	exact assigned
SRR2567054	Kentucky	21	Kentucky	True positives	Kentucky	True positives	Kentucky-I	exact assigned
SRR3664931	Kentucky	21	Kentucky	True positives	Kentucky	True positives	Kentucky-I	exact assigned
SRR3665248	Kentucky	21	Kentucky	True positives	Kentucky	True positives	Kentucky-I	exact assigned
SRR4015740	Kentucky	21	Kentucky	True positives	Kentucky	True positives	Kentucky-I	exact assigned
SRR4032660	Kentucky	21	Kentucky	True positives	Kentucky	True positives	Kentucky-II	exact assigned
SRR5201072	Kentucky	21	Kentucky	True positives	Kentucky	True positives	Kentucky-I	exact assigned
SRR5271436	Kentucky	21	Kentucky	True positives	Kentucky	True positives	Kentucky-II	exact assigned
SRR5441594	Kentucky	21	Kentucky	True positives	Kentucky	True positives	Kentucky-I	exact assigned
SRR5862411	Kentucky	21	Kentucky	True positives	Kentucky	True positives	Kentucky-I	exact assigned
SRR5862663	Kentucky	21	Kentucky	True positives	Kentucky	True positives	Kentucky-I	exact assigned
SRR6336336	Kentucky	21	Kentucky	True positives	Kentucky	True positives	Kentucky-I	exact assigned
SRR6356238	Kentucky	21	Kentucky	True positives	Kentucky	True positives	Kentucky-I	exact assigned
SRR6373596	Kentucky	21	Kentucky	True positives	Kentucky	True positives	Kentucky-I	exact assigned
SRR1177359	Kisarawe	2	Kisarawe	True positives	Kisarawe	True positives	Kisarawe	exact assigned
SRR5633109	Kisarawe	2	Kisarawe	True positives	Kisarawe	True positives	Kisarawe	exact assigned
SRR1644069	Kottbus	8	Kottbus	True positives	Kottbus or Ferruch*	True positives	Kottbus	exact assigned
SRR1645829	Kottbus	8	Kottbus	True positives	Kottbus or Ferruch*	True positives	Kottbus	exact assigned
SRR1645862	Kottbus	8	Kottbus	True positives	Kottbus or Ferruch*	True positives	Kottbus	exact assigned
SRR1772985	Kottbus	8	Kottbus	True positives	Kottbus or Ferruch*	True positives	Kottbus	exact assigned
SRR1958567	Kottbus	8	Kottbus	True positives	Kottbus or Ferruch*	True positives	Kottbus	exact assigned
SRR1967075	Kottbus	8	Kottbus	True positives	Kottbus or Ferruch*	True positives	Kottbus	exact assigned
SRR2533410	Kottbus	8	Kottbus	True positives	Kottbus or Ferruch*	True positives	Kottbus	exact assigned
SRR3284763	Kottbus	8	Kottbus	True positives	Kottbus or Ferruch*	True positives	Kottbus	exact assigned
SRR1645472	Lexington	5	Okerara	Failed	Lexington	True positives	Hartford,Kentucky-II	Failed
SRR3057138	Lexington	5	Okerara	Failed	Lexington	True positives	Kentucky-II,Hartford	Failed
SRR1175799	Lexington	5	Lexington	True positives	Lexington	True positives	Lexington	exact assigned
SRR1553823	Lexington	5	Lexington	True positives	Lexington	True positives	Lexington	exact assigned
SRR1980613	Lexington	5	Lexington	True positives	Lexington	True positives	Lexington	exact assigned
SRR1033530	Litchfield	5	Litchfield	True positives	N/A (The predicted antigenic profile does not exist in the White-Kauffmann-Le Minor scheme)	Failed	Newport-I&III	Failed
SRR1653455	Litchfield	5	Litchfield	True positives	Pakistan or Litchfield*	True positives	Litchfield	exact assigned
SRR3539307	Litchfield	5	Litchfield	True positives	Pakistan or Litchfield*	True positives	Litchfield	exact assigned
SRR5201335	Litchfield	5	Litchfield	True positives	Pakistan or Litchfield*	True positives	Litchfield	exact assigned
SRR5486732	Litchfield	5	Litchfield	True positives	Pakistan or Litchfield*	True positives	Litchfield	exact assigned
SRR1212310	Liverpool	2	Liverpool	True positives	Liverpool	True positives	Liverpool	exact assigned
SRR1560605	Liverpool	2	Liverpool	True positives	Liverpool	True positives	Liverpool	exact assigned
SRR1299429	Livingstone	6	Livingstone	True positives	Livingstone	True positives	Typhimurium	Failed
ERR1714981	Livingstone	6	Livingstone	True positives	Livingstone	True positives	Livingstone	exact assigned
SRR1272770	Livingstone	6	Livingstone	True positives	Livingstone	True positives	Livingstone	exact assigned
SRR1559020	Livingstone	6	Livingstone	True positives	Livingstone	True positives	Livingstone	exact assigned
SRR1966320	Livingstone	6	Livingstone	True positives	Livingstone	True positives	Livingstone	exact assigned
SRR1966336	Livingstone	6	Livingstone	True positives	Livingstone	True positives	Livingstone	exact assigned
SRR1522099	London	4	London	True positives	London	True positives	London-I,London-II,Choleraesuis	partial assigned (one or more false positives)
ERR1046187	London	4	London	True positives	London	True positives	London-I	exact assigned
SRR2078203	London	4	London	True positives	London	True positives	London-I	exact assigned
SRR4005430	London	4	London	True positives	London	True positives	London-I	exact assigned
SRR1258654	Madelia	3	Madelia	True positives	Carrau or Madelia*	True positives	Bovismorbificans-I,Florida	Failed
SRR2962333	Madelia	3	Madelia	True positives	Carrau or Madelia*	True positives	Madelia	exact assigned
SRR2962338	Madelia	3	Madelia	True positives	Carrau or Madelia*	True positives	Madelia	exact assigned
SRR1745566	Manhattan	4	Manhattan	True positives	Yovokome or Manhattan*	True positives	Manhattan	exact assigned
SRR3284641	Manhattan	4	Manhattan	True positives	Yovokome or Manhattan*	True positives	Manhattan	exact assigned
SRR6039066	Manhattan	4	Manhattan	True positives	Yovokome or Manhattan*	True positives	Manhattan	exact assigned
SRR6234210	Manhattan	4	Manhattan	True positives	Yovokome or Manhattan*	True positives	Manhattan	exact assigned
SRR1560608	Matopeni	2	Matopeni	True positives	Matopeni	True positives	Matopeni	exact assigned
SRR3572993	Matopeni	2	Matopeni	True positives	Matopeni	True positives	Matopeni	exact assigned
ERR1082867	Mbandaka	11	Mbandaka	True positives	Mbandaka	True positives	Mbandaka	exact assigned
ERR1715040	Mbandaka	11	Mbandaka	True positives	Mbandaka	True positives	Mbandaka	exact assigned
SRR1068343	Mbandaka	11	Mbandaka	True positives	Mbandaka	True positives	Mbandaka	exact assigned
SRR1613889	Mbandaka	11	Mbandaka	True positives	Mbandaka	True positives	Mbandaka	exact assigned
SRR1965197	Mbandaka	11	Mbandaka	True positives	Mbandaka	True positives	Mbandaka	exact assigned
SRR1968090	Mbandaka	11	Mbandaka	True positives	Mbandaka	True positives	Mbandaka	exact assigned
SRR2670701	Mbandaka	11	Mbandaka	True positives	Mbandaka	True positives	Mbandaka	exact assigned
SRR3952228	Mbandaka	11	Mbandaka	True positives	Mbandaka	True positives	Mbandaka	exact assigned
SRR3996672	Mbandaka	11	Mbandaka	True positives	Mbandaka	True positives	Mbandaka	exact assigned
SRR5116311	Mbandaka	11	Mbandaka	True positives	Mbandaka	True positives	Mbandaka	exact assigned
SRR5185861	Mbandaka	11	Mbandaka	True positives	Mbandaka	True positives	Mbandaka	exact assigned
SRR1041453	Meleagridis	6	Meleagridis	True positives	Meleagridis	True positives	Meleagridis	exact assigned
SRR1048237	Meleagridis	6	Meleagridis	True positives	Meleagridis	True positives	Meleagridis	exact assigned
SRR1556082	Meleagridis	6	Meleagridis	True positives	Meleagridis	True positives	Meleagridis	exact assigned
SRR1569675	Meleagridis	6	Meleagridis	True positives	Meleagridis	True positives	Meleagridis	exact assigned
SRR3294851	Meleagridis	6	Meleagridis	True positives	Meleagridis	True positives	Meleagridis	exact assigned
SRR954972	Meleagridis	6	Meleagridis	True positives	Meleagridis	True positives	Meleagridis	exact assigned
SRR1185807	Mgulani	5	Augustenborg	Failed	Augustenborg	Failed	Stanleyville	Failed
SRR5314813	Mgulani	5	Augustenborg	Failed	Augustenborg	Failed	Heidelberg-II	Failed
SRR1553868	Mgulani	5	Mgulani	True positives	Mgulani	True positives	Mgulani	exact assigned
SRR2102440	Mgulani	5	Mgulani	True positives	Mgulani	True positives	Mgulani	exact assigned
SRR5040809	Mgulani	5	Mgulani	True positives	Mgulani	True positives	Mgulani	exact assigned
SRR5586306	Miami	9	Sendai	Failed	Miami or Sendai or II 9,12:a:1,5*	Failed	Miami	exact assigned
SRR1022657	Miami	9	Miami	True positives	Miami or Sendai or II 9,12:a:1,5*	True positives	Miami	exact assigned
SRR1753649	Miami	9	Miami	True positives	Miami or Sendai or II 9,12:a:1,5*	True positives	Miami	exact assigned
SRR1781616	Miami	9	Miami	True positives	Miami or Sendai or II 9,12:a:1,5*	True positives	Miami	exact assigned
SRR1781710	Miami	9	Miami	True positives	Miami or Sendai or II 9,12:a:1,5*	True positives	Miami	exact assigned
SRR3185061	Miami	9	Miami	True positives	Miami or Sendai or II 9,12:a:1,5*	True positives	Miami	exact assigned
SRR5739438	Miami	9	Miami	True positives	Miami or Sendai or II 9,12:a:1,5*	True positives	Miami	exact assigned
SRR5993074	Miami	9	Miami	True positives	Miami or Sendai or II 9,12:a:1,5*	True positives	Miami	exact assigned
SRR6243384	Miami	9	Miami	True positives	Miami or Sendai or II 9,12:a:1,5*	True positives	Miami	exact assigned
SRR1966954	Mikawasima	6	Mikawasima	True positives	Mikawasima	True positives	Glostrup,Mikawasima	partial assigned (one or more false positives)
ERR406389	Mikawasima	6	Mikawasima	True positives	Mikawasima	True positives	Mikawasima	exact assigned
ERR406403	Mikawasima	6	Mikawasima	True positives	Mikawasima	True positives	Mikawasima	exact assigned
ERR406423	Mikawasima	6	Mikawasima	True positives	Mikawasima	True positives	Mikawasima	exact assigned
ERR406428	Mikawasima	6	Mikawasima	True positives	Mikawasima	True positives	Mikawasima	exact assigned
ERR406438	Mikawasima	6	Mikawasima	True positives	Mikawasima	True positives	Mikawasima	exact assigned
SRR1198902	Minnesota	1	Minnesota	True positives	Minnesota	True positives	Minnesota	exact assigned
SRR1654332	Mississippi	8	Mississippi	True positives	Ibadan or Mississippi or II [1],13,23:b:[1,5]*	True positives	Mississippi-I	exact assigned
SRR1816536	Mississippi	8	Mississippi	True positives	Ibadan or Mississippi or II [1],13,23:b:[1,5]*	True positives	Mississippi-I	exact assigned
SRR1816551	Mississippi	8	Mississippi	True positives	Ibadan or Mississippi or II [1],13,23:b:[1,5]*	True positives	Mississippi-I	exact assigned
SRR5017162	Mississippi	8	Mississippi	True positives	Ibadan or Mississippi or II [1],13,23:b:[1,5]*	True positives	Mississippi-I	exact assigned
SRR5134404	Mississippi	8	Mississippi	True positives	Ibadan or Mississippi or II [1],13,23:b:[1,5]*	True positives	Mississippi-I	exact assigned
SRR5890463	Mississippi	8	Mississippi	True positives	Ibadan or Mississippi or II [1],13,23:b:[1,5]*	True positives	Mississippi-I	exact assigned
SRR5945395	Mississippi	8	Mississippi	True positives	Ibadan or Mississippi or II [1],13,23:b:[1,5]*	True positives	Mississippi-I	exact assigned
SRR6155211	Mississippi	8	Mississippi	True positives	Ibadan or Mississippi or II [1],13,23:b:[1,5]*	True positives	Mississippi-I	exact assigned
SRR1616722	Monschaui	3	Monschaui	True positives	II 35:m,t:- or Monschaui*	True positives	Monschaui	exact assigned
SRR3322018	Monschaui	3	Monschaui	True positives	II 35:m,t:- or Monschaui*	True positives	Monschaui	exact assigned
SRR5584985	Monschaui	3	Monschaui	True positives	II 35:m,t:- or Monschaui*	True positives	Monschaui	exact assigned
SRR5799584	Montevideo	23	Montevideo	True positives	Montevideo	True positives	Oranienburg	Failed
SRR3062410	Montevideo	23	Montevideo	True positives	N/A (The predicted antigenic profile does not exist in the White-Kauffmann-Le Minor scheme)	Failed	Oranienburg,Montevideo	partial assigned (one or more false positives)
SRR1106230	Montevideo	23	Montevideo	True positives	Montevideo	True positives	Oranienburg,Montevideo	partial assigned (one or more false positives)
SRR1593384	Montevideo	23	Montevideo	True positives	Montevideo	True positives	Oranienburg,Montevideo	partial assigned (one or more false positives)
SRR1645570	Montevideo	23	Montevideo	True positives	Montevideo	True positives	Oranienburg,Montevideo	partial assigned (one or more false positives)
SRR1698184	Montevideo	23	Montevideo	True positives	Montevideo	True positives	Oranienburg,Montevideo	partial assigned (one or more false positives)
SRR1708053	Montevideo	23	Montevideo	True positives	Montevideo	True positives	Oranienburg,Montevideo	partial assigned (one or more false positives)
SRR1966256	Montevideo	23	Montevideo	True positives	Montevideo	True positives	Oranienburg,Montevideo	partial assigned (one or more false positives)
SRR2959977	Montevideo	23	Montevideo	True positives	Montevideo	True positives	Montevideo,Oranienburg	partial assigned (one or more false positives)
SRR3322187	Montevideo	23	Montevideo	True positives	Montevideo	True positives	Oranienburg,Montevideo	partial assigned (one or more false positives)
SRR3323024	Montevideo	23	Montevideo	True positives	Montevideo	True positives	Oranienburg,Montevideo	partial assigned (one or more false positives)
SRR3479676	Montevideo	23	Montevideo	True positives	Montevideo	True positives	Oranienburg,Montevideo	partial assigned (one or more false positives)
SRR4012342	Montevideo	23	Montevideo	True positives	Montevideo	True positives	Oranienburg,Montevideo	partial assigned (one or more false positives)
SRR4244408	Montevideo	23	Montevideo	True positives	Montevideo	True positives	Oranienburg,Montevideo	partial assigned (one or more false positives)
SRR5063028	Montevideo	23	Montevideo	True positives	Montevideo	True positives	Oranienburg,Montevideo	partial assigned (one or more false positives)
SRR6203417	Montevideo	23	Montevideo	True positives	Montevideo	True positives	Oranienburg,Montevideo	partial assigned (one or more false positives)
SRR6310051	Montevideo	23	Montevideo	True positives	Montevideo	True positives	Oranienburg,Montevideo	partial assigned (one or more false positives)
ERR1715178	Montevideo	23	Montevideo	True positives	N/A (The predicted antigenic profile does not exist in the White-Kauffmann-Le Minor scheme)	Failed	Montevideo	exact assigned
SRR5409357	Montevideo	23	Montevideo	True positives	N/A (The predicted antigenic profile does not exist in the White-Kauffmann-Le Minor scheme)	Failed	Montevideo	exact assigned
SRR1575977	Montevideo	23	Montevideo	True positives	Montevideo	True positives	Montevideo	exact assigned
SRR1958411	Montevideo	23	Montevideo	True positives	Montevideo	True positives	Montevideo	exact assigned
SRR1959725	Montevideo	23	Montevideo	True positives	Montevideo	True positives	Montevideo	exact assigned
SRR5762181	Montevideo	23	Montevideo	True positives	Montevideo	True positives	Montevideo	exact assigned
SRR1997820	Muenchen	31	Muenchen	True positives	N/A (The predicted antigenic profile does not exist in the White-Kauffmann-Le Minor scheme)	Failed	Muenchen-I	exact assigned
SRR5366773	Muenchen	31	Muenchen	True positives	N/A (The predicted antigenic profile does not exist in the White-Kauffmann-Le Minor scheme)	Failed	Muenchen-I	exact assigned
ERR2223873	Muenchen	31	Muenchen	True positives	Virginia or Muenchen*	True positives	Muenchen-I	exact assigned
ERR230385	Muenchen	31	Muenchen	True positives	Virginia or Muenchen*	True positives	Muenchen-I	exact assigned
SRR1021942	Muenchen	31	Muenchen	True positives	Virginia or Muenchen*	True positives	Muenchen-I	exact assigned
SRR1025968	Muenchen	31	Muenchen	True positives	Virginia or Muenchen*	True positives	Muenchen-I	exact assigned
SRR1025970	Muenchen	31	Muenchen	True positives	Virginia or Muenchen*	True positives	Muenchen-I	exact assigned
SRR1048297	Muenchen	31	Muenchen	True positives	Virginia or Muenchen*	True positives	Muenchen-I	exact assigned
SRR1060562	Muenchen	31	Muenchen	True positives	Virginia or Muenchen*	True positives	Muenchen-II	exact assigned
SRR1122489	Muenchen	31	Muenchen	True positives	Virginia or Muenchen*	True positives	Muenchen-I	exact assigned
SRR1179217	Muenchen	31	Muenchen	True positives	Virginia or Muenchen*	True positives	Muenchen-I	exact assigned
SRR1264988	Muenchen	31	Muenchen	True positives	Virginia or Muenchen*	True positives	Muenchen-I	exact assigned
SRR1553722	Muenchen	31	Muenchen	True positives	Virginia or Muenchen*	True positives	Muenchen-I	exact assigned
SRR1560579	Muenchen	31	Muenchen	True positives	Virginia or Muenchen*	True positives	Muenchen-I	exact assigned
SRR1633860	Muenchen	31	Muenchen	True positives	Virginia or Muenchen*	True positives	Muenchen-I	exact assigned
SRR1814275	Muenchen	31	Muenchen	True positives	Virginia or Muenchen*	True positives	Muenchen-I	exact assigned
SRR1815246	Muenchen	31	Muenchen	True positives	Virginia or Muenchen*	True positives	Muenchen-I	exact assigned
SRR1815270	Muenchen	31	Muenchen	True positives	Virginia or Muenchen*	True positives	Muenchen-I	exact assigned
SRR1969579	Muenchen	31	Muenchen	True positives	Virginia or Muenchen*	True positives	Muenchen-I	exact assigned
SRR1973635	Muenchen	31	Muenchen	True positives	Virginia or Muenchen*	True positives	Muenchen-I	exact assigned
SRR1973769	Muenchen	31	Muenchen	True positives	Virginia or Muenchen*	True positives	Muenchen-I	exact assigned
SRR2002737	Muenchen	31	Muenchen	True positives	Virginia or Muenchen*	True positives	Muenchen-I	exact assigned
SRR2015651	Muenchen	31	Muenchen	True positives	Virginia or Muenchen*	True positives	Muenchen-I	exact assigned
SRR2054125	Muenchen	31	Muenchen	True positives	Virginia or Muenchen*	True positives	Muenchen-I	exact assigned
SRR2407772	Muenchen	31	Muenchen	True positives	Virginia or Muenchen*	True positives	Muenchen-II	exact assigned
SRR2890123	Muenchen	31	Muenchen	True positives	Virginia or Muenchen*	True positives	Muenchen-I	exact assigned
SRR3173633	Muenchen	31	Muenchen	True positives	Virginia or Muenchen*	True positives	Muenchen-I	exact assigned
SRR5235471	Muenchen	31	Muenchen	True positives	Virginia or Muenchen*	True positives	Muenchen-I	exact assigned
SRR5413687	Muenchen	31	Muenchen	True positives	Virginia or Muenchen*	True positives	Muenchen-I	exact assigned
SRR5740043	Muenchen	31	Muenchen	True positives	Virginia or Muenchen*	True positives	Muenchen-II	exact assigned
SRR5755635	Muenchen	31	Muenchen	True positives	Virginia or Muenchen*	True positives	Muenchen-I	exact assigned
ERR029045	Muenster	3	Muenster	True positives	Muenster	True positives	Muenster	exact assigned
SRR4434270	Muenster	3	Muenster	True positives	Muenster	True positives	Muenster	exact assigned
SRR6480980	Muenster	3	Muenster	True positives	Muenster	True positives	Muenster	exact assigned
ERR2194311	Napoli	5	Zaiman	Failed	Napoli	True positives	Napoli	exact assigned
ERR2194317	Napoli	5	Zaiman	Failed	Napoli	True positives	Napoli	exact assigned
SRR1969104	Napoli	5	Zaiman	Failed	Napoli	True positives	Napoli	exact assigned
ERR2177566	Napoli	5	Napoli	True positives	Napoli	True positives	Napoli	exact assigned
ERR2194304	Napoli	5	Napoli	True positives	Napoli	True positives	Napoli	exact assigned
SRR1153383	Newport	62	Enteritidis	Failed	Enteritidis	Failed	Enteritidis-Global	Failed
SRR1033501	Newport	62	Newport	True positives	N/A (The predicted antigenic profile does not exist in the White-Kauffmann-Le Minor scheme)	Failed	Newport-I&III,Newport-I&II	exact assigned
ERR1046240	Newport	62	Newport	True positives	Newport or Bardo*	True positives	Newport-I&II	exact assigned
ERR1046270	Newport	62	Newport	True positives	Newport or Bardo*	True positives	Newport-I&II	exact assigned
ERR1714716	Newport	62	Newport	True positives	Newport or Bardo*	True positives	Newport-I&II,Newport-I&III	exact assigned
ERR1714729	Newport	62	Newport	True positives	Newport or Bardo*	True positives	Newport-I&II,Newport-I&III	exact assigned
ERR1714819	Newport	62	Newport	True positives	Newport or Bardo*	True positives	Newport-I&II,Newport-I&III	exact assigned
ERR1714924	Newport	62	Newport	True positives	Newport or Bardo*	True positives	Newport-I&II,Newport-I&III	exact assigned
ERR204062	Newport	62	Newport	True positives	Newport or Bardo*	True positives	Newport-I&II,Newport-I&III	exact assigned
ERR204089	Newport	62	Newport	True positives	Newport or Bardo*	True positives	Newport-I&II,Newport-I&III	exact assigned
SRR1030851	Newport	62	Newport	True positives	Newport or Bardo*	True positives	Newport-I&II,Newport-I&III	exact assigned
SRR1106445	Newport	62	Newport	True positives	Newport or Bardo*	True positives	Newport-I&II,Newport-I&III	exact assigned
SRR1164590	Newport	62	Newport	True positives	Newport or Bardo*	True positives	Newport-I&II,Newport-I&III	exact assigned
SRR1220813	Newport	62	Newport	True positives	Newport or Bardo*	True positives	Newport-I&III,Newport-I&II	exact assigned
SRR1300706	Newport	62	Newport	True positives	Newport or Bardo*	True positives	Newport-I&III	exact assigned
SRR1511560	Newport	62	Newport	True positives	Newport or Bardo*	True positives	Newport-I&III,Newport-I&II	exact assigned
SRR1566322	Newport	62	Newport	True positives	Newport or Bardo*	True positives	Newport-I&III,Newport-I&II	exact assigned
SRR1576233	Newport	62	Newport	True positives	Newport or Bardo*	True positives	Newport-I&III,Newport-I&II	exact assigned
SRR1613903	Newport	62	Newport	True positives	Newport or Bardo*	True positives	Newport-I&II,Newport-I&III	exact assigned
SRR1616730	Newport	62	Newport	True positives	Newport or Bardo*	True positives	Newport-I&II,Newport-I&III	exact assigned
SRR1635122	Newport	62	Newport	True positives	Newport or Bardo*	True positives	Newport-I&II,Newport-I&III	exact assigned
SRR1636915	Newport	62	Newport	True positives	Newport or Bardo*	True positives	Newport-I&III,Newport-I&II	exact assigned
SRR1646390	Newport	62	Newport	True positives	Newport or Bardo*	True positives	Newport-I&II,Newport-I&III	exact assigned
SRR1652541	Newport	62	Newport	True positives	Newport or Bardo*	True positives	Newport-I&III	exact assigned
SRR1657004	Newport	62	Newport	True positives	Newport or Bardo*	True positives	Newport-I&II,Newport-I&III	exact assigned
SRR1664321	Newport	62	Newport	True positives	Newport or Bardo*	True positives	Newport-I&III	exact assigned
SRR1728730	Newport	62	Newport	True positives	Newport or Bardo*	True positives	Newport-I&III,Newport-I&II	exact assigned
SRR1772990	Newport	62	Newport	True positives	Newport or Bardo*	True positives	Newport-I&II	exact assigned
SRR1840750	Newport	62	Newport	True positives	Newport or Bardo*	True positives	Newport-I&II,Newport-I&III	exact assigned
SRR1967865	Newport	62	Newport	True positives	Newport or Bardo*	True positives	Newport-I&II,Newport-I&III	exact assigned
SRR1969157	Newport	62	Newport	True positives	Newport or Bardo*	True positives	Newport-I&II,Newport-I&III	exact assigned
SRR1969351	Newport	62	Newport	True positives	Newport or Bardo*	True positives	Newport-I&III,Newport-I&II	exact assigned
SRR1998971	Newport	62	Newport	True positives	Newport or Bardo*	True positives	Newport-I&III	exact assigned
SRR2054199	Newport	62	Newport	True positives	Newport or Bardo*	True positives	Newport-I&II,Newport-I&III	exact assigned
SRR2180215	Newport	62	Newport	True positives	Newport or Bardo*	True positives	Newport-I&III,Newport-I&II	exact assigned
SRR2414495	Newport	62	Newport	True positives	Newport or Bardo*	True positives	Newport-I&III	exact assigned
SRR2571576	Newport	62	Newport	True positives	Newport or Bardo*	True positives	Newport-I&III,Newport-I&II	exact assigned
SRR2962472	Newport	62	Newport	True positives	Newport or Bardo*	True positives	Newport-I&III	exact assigned
SRR2975878	Newport	62	Newport	True positives	Newport or Bardo*	True positives	Newport-I&III,Newport-I&II	exact assigned
SRR2975983	Newport	62	Newport	True positives	Newport or Bardo*	True positives	Newport-I&III	exact assigned
SRR3049649	Newport	62	Newport	True positives	Newport or Bardo*	True positives	Newport-I&II,Newport-I&III	exact assigned
SRR3222388	Newport	62	Newport	True positives	Newport or Bardo*	True positives	Newport-I&III,Newport-I&II	exact assigned
SRR3474680	Newport	62	Newport	True positives	Newport or Bardo*	True positives	Newport-I&III	exact assigned
SRR3710741	Newport	62	Newport	True positives	Newport or Bardo*	True positives	Newport-I&II,Newport-I&III	exact assigned
SRR3928696	Newport	62	Newport	True positives	Newport or Bardo*	True positives	Newport-I&III	exact assigned
SRR5113875	Newport	62	Newport	True positives	Newport or Bardo*	True positives	Newport-I&II	exact assigned
SRR5188665	Newport	62	Newport	True positives	Newport or Bardo*	True positives	Newport-I&III	exact assigned
SRR5215725	Newport	62	Newport	True positives	Newport or Bardo*	True positives	Newport-I&II,Newport-I&III	exact assigned
SRR5343249	Newport	62	Newport	True positives	Newport or Bardo*	True positives	Newport-I&II,Newport-I&III	exact assigned
SRR5368965	Newport	62	Newport	True positives	Newport or Bardo*	True positives	Newport-I&III	exact assigned
SRR5454394	Newport	62	Newport	True positives	Newport or Bardo*	True positives	Newport-I&III	exact assigned
SRR5585082	Newport	62	Newport	True positives	Newport or Bardo*	True positives	Newport-I&II,Newport-I&III	exact assigned
SRR5593411	Newport	62	Newport	True positives	Newport or Bardo*	True positives	Newport-I&II,Newport-I&III	exact assigned
SRR5642016	Newport	62	Newport	True positives	Newport or Bardo*	True positives	Newport-I&III	exact assigned
SRR5823573	Newport	62	Newport	True positives	Newport or Bardo*	True positives	Newport-I&III,Newport-I&II	exact assigned
SRR5927416	Newport	62	Newport	True positives	Newport or Bardo*	True positives	Newport-I&II,Newport-I&III	exact assigned
SRR5935662	Newport	62	Newport	True positives	Newport or Bardo*	True positives	Newport-I&II,Newport-I&III	exact assigned
SRR5945392	Newport	62	Newport	True positives	Newport or Bardo*	True positives	Newport-I&II,Newport-I&III	exact assigned
SRR5988794	Newport	62	Newport	True positives	Newport or Bardo*	True positives	Newport-I&II,Newport-I&III	exact assigned
SRR6165479	Newport	62	Newport	True positives	Newport or Bardo*	True positives	Newport-I&II,Newport-I&III	exact assigned
SRR6165507	Newport	62	Newport	True positives	Newport or Bardo*	True positives	Newport-I&II,Newport-I&III	exact assigned
SRR6373463	Newport	62	Newport	True positives	Newport or Bardo*	True positives	Newport-I&III	exact assigned
SRR2075305	Norwich	7	Norwich	True positives	Norwich	True positives	0	Failed
SRR5527036	Norwich	7	Norwich	True positives	Norwich	True positives	0	Failed
SRR2075076	Norwich	7	Daytona|Sharon	Failed	Daytona	Failed	Norwich	exact assigned
SRR1576199	Norwich	7	Norwich	True positives	Norwich	True positives	Norwich	exact assigned
SRR2601185	Norwich	7	Norwich	True positives	Norwich	True positives	Norwich	exact assigned
SRR6345592	Norwich	7	Norwich	True positives	Norwich	True positives	Norwich	exact assigned
SRR6676555	Norwich	7	Norwich	True positives	Norwich	True positives	Norwich	exact assigned
SRR4279916	Ohio	4	Ohio	True positives	N/A (The predicted antigenic profile does not exist in the White-Kauffmann-Le Minor scheme)	Failed	Ohio	exact assigned
ERR160972	Ohio	4	Ohio	True positives	Ohio	True positives	Ohio	exact assigned
SRR2533428	Ohio	4	Ohio	True positives	Ohio	True positives	Ohio	exact assigned
SRR4046884	Ohio	4	Ohio	True positives	Ohio	True positives	Ohio	exact assigned
SRR1966350	Oranienburg	15	Oranienburg	True positives	Oranienburg or II 6,7:m,t:-*	True positives	Montevideo	Failed
ERR2210499	Oranienburg	15	Oranienburg	True positives	Oranienburg or II 6,7:m,t:-*	True positives	Oranienburg,Montevideo	partial assigned (one or more false positives)
SRR1555369	Oranienburg	15	Oranienburg	True positives	Oranienburg or II 6,7:m,t:-*	True positives	Oranienburg,Montevideo	partial assigned (one or more false positives)
SRR1821294	Oranienburg	15	Oranienburg	True positives	Oranienburg or II 6,7:m,t:-*	True positives	Oranienburg,Montevideo	partial assigned (one or more false positives)
SRR2910871	Oranienburg	15	Oranienburg	True positives	Oranienburg or II 6,7:m,t:-*	True positives	Oranienburg,Montevideo	partial assigned (one or more false positives)
SRR5259798	Oranienburg	15	Oranienburg	True positives	Oranienburg or II 6,7:m,t:-*	True positives	Bonariensis,Oranienburg,Montevideo,Teko	partial assigned (one or more false positives)
SRR6310595	Oranienburg	15	Oranienburg	True positives	Oranienburg or II 6,7:m,t:-*	True positives	Oranienburg,Montevideo	partial assigned (one or more false positives)
SRR1105686	Oranienburg	15	Oranienburg	True positives	Oranienburg or II 6,7:m,t:-*	True positives	Oranienburg	exact assigned
SRR1481660	Oranienburg	15	Oranienburg	True positives	Oranienburg or II 6,7:m,t:-*	True positives	Oranienburg-III	exact assigned
SRR1957905	Oranienburg	15	Oranienburg	True positives	Oranienburg or II 6,7:m,t:-*	True positives	Oranienburg	exact assigned
SRR1958527	Oranienburg	15	Oranienburg	True positives	Oranienburg or II 6,7:m,t:-*	True positives	Oranienburg	exact assigned
SRR1963383	Oranienburg	15	Oranienburg	True positives	Oranienburg or II 6,7:m,t:-*	True positives	Oranienburg	exact assigned
SRR1965677	Oranienburg	15	Oranienburg	True positives	Oranienburg or II 6,7:m,t:-*	True positives	Oranienburg-III	exact assigned
SRR1965954	Oranienburg	15	Oranienburg	True positives	Oranienburg or II 6,7:m,t:-*	True positives	Oranienburg	exact assigned
SRR6380265	Oranienburg	15	Oranienburg	True positives	Oranienburg or II 6,7:m,t:-*	True positives	Oranienburg-III	exact assigned
ERR1714967	Orion	2	Orion	True positives	Orion	True positives	Orion	exact assigned
SRR1996208	Orion	2	Orion	True positives	Orion	True positives	Orion	exact assigned
SRR4420844	Oslo	3	Oslo	True positives	Oslo	True positives	Oslo-II,Norwich	partial assigned (one or more false positives)
ERR1737347	Oslo	3	Oslo	True positives	Oslo	True positives	Oslo-I	exact assigned
SRR6324196	Oslo	3	Oslo	True positives	Oslo	True positives	Oslo-I	exact assigned
SRR1556979	Ouakam	2	Ouakam	True positives	N/A (The predicted antigenic profile does not exist in the White-Kauffmann-Le Minor scheme)	Failed	Ouakam	exact assigned
SRR5647046	Ouakam	2	Ouakam	True positives	N/A (The predicted antigenic profile does not exist in the White-Kauffmann-Le Minor scheme)	Failed	Ouakam	exact assigned
SRR3047883	Panama	7	Panama	True positives	Panama or Houston*	True positives	Bovismorbificans-I	Failed
ERR1046131	Panama	7	Panama	True positives	N/A (The predicted antigenic profile does not exist in the White-Kauffmann-Le Minor scheme)	Failed	Panama	exact assigned
SRR1816854	Panama	7	Panama	True positives	N/A (The predicted antigenic profile does not exist in the White-Kauffmann-Le Minor scheme)	Failed	Panama	exact assigned
SRR1106444	Panama	7	Panama	True positives	Panama or Houston*	True positives	Panama	exact assigned
SRR1962131	Panama	7	Panama	True positives	Panama or Houston*	True positives	Panama	exact assigned
SRR5888434	Panama	7	Panama	True positives	Panama or Houston*	True positives	Panama	exact assigned
SRR6289951	Panama	7	Panama	True positives	Panama or Houston*	True positives	Panama	exact assigned
ERR026899	Paratyphi A	6	Paratyphi A	True positives	Paratyphi A	True positives	Paratyphi_A-II,Paratyphi_A-I	exact assigned
ERR028508	Paratyphi A	6	Paratyphi A	True positives	Paratyphi A	True positives	Paratyphi_A-II	exact assigned
ERR028938	Paratyphi A	6	Paratyphi A	True positives	Paratyphi A	True positives	Paratyphi_A-II,Paratyphi_A-I	exact assigned
ERR134199	Paratyphi A	6	Paratyphi A	True positives	Paratyphi A	True positives	Paratyphi_A-II,Paratyphi_A-I	exact assigned
ERR134223	Paratyphi A	6	Paratyphi A	True positives	Paratyphi A	True positives	Paratyphi_A-II,Paratyphi_A-I	exact assigned
ERR1788794	Paratyphi A	6	Paratyphi A	True positives	Paratyphi A	True positives	Paratyphi_A-II,Paratyphi_A-I	exact assigned
SRR5055256	Paratyphi B	52	I 4,[5],12:b:-	True positives	N/A (The predicted antigenic profile does not exist in the White-Kauffmann-Le Minor scheme)	Failed	0	Failed
SRR5659580	Paratyphi B	52	I 4,[5],12:b:-	True positives	II [1],4,[5],12,[27]:b:[e,n,x] or Schleissheim (Schleissheim is extremely rare)*	Failed	Stanley	Failed
ERR1755565	Paratyphi B	52	Paratyphi B var. Java	True positives	Paratyphi B	True positives	Bredeney,Potsdam	Failed
SRR1164570	Paratyphi B	52	Paratyphi B var. Java monophasic	True positives	II [1],4,[5],12,[27]:b:[e,n,x] or Schleissheim (Schleissheim is extremely rare)*	Failed	Paratyphi_B,Paratyphi_B-mono,Heidelberg-II	partial assigned (one or more false positives)
SRR2585489	Paratyphi B	52	Paratyphi B var. Java	True positives	Paratyphi B	True positives	Paratyphi_B,Berta	partial assigned (one or more false positives)
SRR1122706	Paratyphi B	52	Dublin	Failed	Enteritidis or Gallinarum	Failed	Paratyphi_B	exact assigned
SRR4258196	Paratyphi B	52	Enteritidis	Failed	Enteritidis or Gallinarum	Failed	Paratyphi_B	exact assigned
SRR5052652	Paratyphi B	52	Dublin	Failed	Enteritidis or Gallinarum	Failed	Paratyphi_B	exact assigned
ERR023401	Paratyphi B	52	Paratyphi B	True positives	N/A (The predicted antigenic profile does not exist in the White-Kauffmann-Le Minor scheme)	Failed	Paratyphi_B	exact assigned
ERR1046268	Paratyphi B	52	Paratyphi B var. Java monophasic	True positives	N/A (The predicted antigenic profile does not exist in the White-Kauffmann-Le Minor scheme)	Failed	Paratyphi_B,Paratyphi_B-mono	exact assigned
ERR1276849	Paratyphi B	52	Paratyphi B var. Java	True positives	N/A (The predicted antigenic profile does not exist in the White-Kauffmann-Le Minor scheme)	Failed	Paratyphi_B	exact assigned
ERR1276850	Paratyphi B	52	Paratyphi B var. Java	True positives	N/A (The predicted antigenic profile does not exist in the White-Kauffmann-Le Minor scheme)	Failed	Paratyphi_B	exact assigned
ERR278742	Paratyphi B	52	Paratyphi B var. Java	True positives	N/A (The predicted antigenic profile does not exist in the White-Kauffmann-Le Minor scheme)	Failed	Paratyphi_B	exact assigned
ERR460133	Paratyphi B	52	Paratyphi B	True positives	Abony or II [1],4,[5],12,[27]:b:[e,n,x]*	Failed	Paratyphi_B	exact assigned
SRR1515000	Paratyphi B	52	I 4,[5],12:b:-	True positives	II [1],4,[5],12,[27]:b:[e,n,x] or Schleissheim (Schleissheim is extremely rare)*	Failed	Paratyphi_B,Paratyphi_B-mono	exact assigned
SRR1566303	Paratyphi B	52	Paratyphi B var. Java monophasic	True positives	II [1],4,[5],12,[27]:b:[e,n,x] or Schleissheim (Schleissheim is extremely rare)*	Failed	Paratyphi_B-mono	exact assigned
SRR1566320	Paratyphi B	52	I 4,[5],12:b:-	True positives	II [1],4,[5],12,[27]:b:[e,n,x] or Schleissheim (Schleissheim is extremely rare)*	Failed	Paratyphi_B-mono	exact assigned
SRR1633483	Paratyphi B	52	I 4,[5],12:b:-	True positives	II [1],4,[5],12,[27]:b:[e,n,x] or Schleissheim (Schleissheim is extremely rare)*	Failed	Paratyphi_B-mono,Paratyphi_B	exact assigned
SRR1635201	Paratyphi B	52	I 4,[5],12:b:-	True positives	N/A (The predicted antigenic profile does not exist in the White-Kauffmann-Le Minor scheme)	Failed	Paratyphi_B-mono	exact assigned
SRR1814281	Paratyphi B	52	Paratyphi B var. Java monophasic	True positives	II [1],4,[5],12,[27]:b:[e,n,x] or Schleissheim (Schleissheim is extremely rare)*	Failed	Paratyphi_B,Paratyphi_B-mono	exact assigned
SRR1958039	Paratyphi B	52	Paratyphi B var. Java monophasic	True positives	II [1],4,[5],12,[27]:b:[e,n,x] or Schleissheim (Schleissheim is extremely rare)*	Failed	Paratyphi_B,Paratyphi_B-mono	exact assigned
SRR1960084	Paratyphi B	52	Paratyphi B var. Java monophasic	True positives	II [1],4,[5],12,[27]:b:[e,n,x] or Schleissheim (Schleissheim is extremely rare)*	Failed	Paratyphi_B-mono	exact assigned
SRR3048538	Paratyphi B	52	Paratyphi B var. Java monophasic	True positives	II [1],4,[5],12,[27]:b:[e,n,x] or Schleissheim (Schleissheim is extremely rare)*	Failed	Paratyphi_B-mono,Paratyphi_B	exact assigned
SRR3049062	Paratyphi B	52	Paratyphi B var. Java monophasic	True positives	II [1],4,[5],12,[27]:b:[e,n,x] or Schleissheim (Schleissheim is extremely rare)*	Failed	Paratyphi_B,Paratyphi_B-mono	exact assigned
SRR3049388	Paratyphi B	52	Paratyphi B var. Java monophasic	True positives	II [1],4,[5],12,[27]:b:[e,n,x] or Schleissheim (Schleissheim is extremely rare)*	Failed	Paratyphi_B-mono	exact assigned
SRR5583008	Paratyphi B	52	Paratyphi B	True positives	N/A (The predicted antigenic profile does not exist in the White-Kauffmann-Le Minor scheme)	Failed	Paratyphi_B	exact assigned
SRR5749781	Paratyphi B	52	Paratyphi B var. Java monophasic	True positives	II [1],4,[5],12,[27]:b:[e,n,x] or Schleissheim (Schleissheim is extremely rare)*	Failed	Paratyphi_B-mono,Paratyphi_B	exact assigned
SRR5888692	Paratyphi B	52	I 4,[5],12:b:-	True positives	II [1],4,[5],12,[27]:b:[e,n,x] or Schleissheim (Schleissheim is extremely rare)*	Failed	Paratyphi_B-mono	exact assigned
SRR5890493	Paratyphi B	52	Paratyphi B var. Java monophasic	True positives	II [1],4,[5],12,[27]:b:[e,n,x] or Schleissheim (Schleissheim is extremely rare)*	Failed	Paratyphi_B,Paratyphi_B-mono	exact assigned
SRR5896219	Paratyphi B	52	I 4,[5],12:b:-|Schleissheim	True positives	II [1],4,[5],12,[27]:b:[e,n,x] or Schleissheim (Schleissheim is extremely rare)*	Failed	Paratyphi_B-mono	exact assigned
SRR5908150	Paratyphi B	52	I 4,[5],12:b:-	True positives	II [1],4,[5],12,[27]:b:[e,n,x] or Schleissheim (Schleissheim is extremely rare)*	Failed	Paratyphi_B,Paratyphi_B-mono	exact assigned
SRR6317180	Paratyphi B	52	Paratyphi B var. Java monophasic	True positives	II [1],4,[5],12,[27]:b:[e,n,x] or Schleissheim (Schleissheim is extremely rare)*	Failed	Paratyphi_B,Paratyphi_B-mono	exact assigned
SRR6321146	Paratyphi B	52	I 4,[5],12:b:-	True positives	II [1],4,[5],12,[27]:b:[e,n,x] or Schleissheim (Schleissheim is extremely rare)*	Failed	Paratyphi_B-mono,Berta,Paratyphi_B	exact assigned
SRR6345586	Paratyphi B	52	Paratyphi B var. Java monophasic	True positives	N/A (The predicted antigenic profile does not exist in the White-Kauffmann-Le Minor scheme)	Failed	Paratyphi_B,Paratyphi_B-mono	exact assigned
SRR6380936	Paratyphi B	52	I 4,[5],12:b:-	True positives	II [1],4,[5],12,[27]:b:[e,n,x] or Schleissheim (Schleissheim is extremely rare)*	Failed	Paratyphi_B-mono	exact assigned
ERR126106	Paratyphi B	52	Paratyphi B var. Java	True positives	Paratyphi B	True positives	Paratyphi_B	exact assigned
ERR129853	Paratyphi B	52	Paratyphi B var. Java	True positives	Paratyphi B	True positives	Paratyphi_B	exact assigned
ERR129891	Paratyphi B	52	Paratyphi B	True positives	Paratyphi B	True positives	Paratyphi_B	exact assigned
ERR1817521	Paratyphi B	52	Paratyphi B var. Java	True positives	Paratyphi B	True positives	Paratyphi_B	exact assigned
ERR298743	Paratyphi B	52	Paratyphi B	True positives	Paratyphi B	True positives	Paratyphi_B	exact assigned
SRR1646145	Paratyphi B	52	Paratyphi B var. Java	True positives	Paratyphi B	True positives	Paratyphi_B	exact assigned
SRR1917444	Paratyphi B	52	Paratyphi B var. Java	True positives	Paratyphi B	True positives	Paratyphi_B	exact assigned
SRR1959721	Paratyphi B	52	Paratyphi B var. Java	True positives	Paratyphi B	True positives	Paratyphi_B	exact assigned
SRR1966217	Paratyphi B	52	Paratyphi B var. Java	True positives	Paratyphi B	True positives	Paratyphi_B	exact assigned
SRR1967842	Paratyphi B	52	Paratyphi B var. Java	True positives	Paratyphi B	True positives	Paratyphi_B	exact assigned
SRR4418382	Paratyphi B	52	Paratyphi B var. Java	True positives	Paratyphi B	True positives	Paratyphi_B	exact assigned
SRR5051079	Paratyphi B	52	Paratyphi B var. Java	True positives	Paratyphi B	True positives	Paratyphi_B	exact assigned
SRR5055570	Paratyphi B	52	Paratyphi B var. Java	True positives	Paratyphi B	True positives	Paratyphi_B	exact assigned
SRR5584995	Paratyphi B	52	Paratyphi B var. Java	True positives	Paratyphi B	True positives	Paratyphi_B	exact assigned
SRR5749799	Paratyphi B	52	Paratyphi B var. Java	True positives	Paratyphi B	True positives	Paratyphi_B	exact assigned
SRR5887790	Paratyphi B	52	Paratyphi B var. Java	True positives	Paratyphi B	True positives	Paratyphi_B	exact assigned
SRR6750583	Paratyphi B	52	Paratyphi B var. Java	True positives	Paratyphi B	True positives	Paratyphi_B	exact assigned
ERR016892	Paratyphi C	4	Paratyphi C	True positives	N/A (The predicted antigenic profile does not exist in the White-Kauffmann-Le Minor scheme)	Failed	Paratyphi_C	exact assigned
ERR2009637	Paratyphi C	4	Paratyphi C	True positives	Paratyphi C or Choleraesuis or Typhisuis*	True positives	Paratyphi_C	exact assigned
ERR2009668	Paratyphi C	4	Paratyphi C	True positives	Paratyphi C or Choleraesuis or Typhisuis*	True positives	Paratyphi_C	exact assigned
ERR2009673	Paratyphi C	4	Paratyphi C	True positives	Paratyphi C or Choleraesuis or Typhisuis*	True positives	Paratyphi_C	exact assigned
SRR1980611	Pomona	4	Yarrabah	Failed	Pomona	True positives	Give-III	Failed
SRR1106433	Pomona	4	Pomona	True positives	Pomona	True positives	Pomona	exact assigned
SRR2751888	Pomona	4	Pomona	True positives	Pomona	True positives	Pomona	exact assigned
SRR6434265	Pomona	4	Pomona	True positives	Pomona	True positives	Pomona	exact assigned
SRR1035535	Poona	14	Poona	True positives	Farmsen or Poona*	True positives	0	Failed
SRR2911729	Poona	14	Poona	True positives	Farmsen or Poona*	True positives	0	Failed
SRR6446749	Poona	14	Poona	True positives	Farmsen or Poona*	True positives	0	Failed
ERR998582	Poona	14	Poona	True positives	Farmsen or Poona*	True positives	Poona,Berta	partial assigned (one or more false positives)
SRR3115976	Poona	14	Poona	True positives	N/A (The predicted antigenic profile does not exist in the White-Kauffmann-Le Minor scheme)	Failed	Poona	exact assigned
ERR1556132	Poona	14	Poona	True positives	Farmsen or Poona*	True positives	Poona	exact assigned
ERR230389	Poona	14	Poona	True positives	Farmsen or Poona*	True positives	Poona	exact assigned
SRR1633499	Poona	14	Poona	True positives	Farmsen or Poona*	True positives	Poona	exact assigned
SRR1646203	Poona	14	Poona	True positives	Farmsen or Poona*	True positives	Poona	exact assigned
SRR2401925	Poona	14	Poona	True positives	Farmsen or Poona*	True positives	Poona	exact assigned
SRR5000269	Poona	14	Poona	True positives	Farmsen or Poona*	True positives	Poona	exact assigned
SRR5307898	Poona	14	Poona	True positives	Farmsen or Poona*	True positives	Poona	exact assigned
SRR5739445	Poona	14	Poona	True positives	Farmsen or Poona*	True positives	Poona	exact assigned
SRR6353850	Poona	14	Poona	True positives	Farmsen or Poona*	True positives	Poona	exact assigned
ERR230461	Potsdam	2	Potsdam	True positives	Potsdam	True positives	Potsdam	exact assigned
SRR1634590	Potsdam	2	Potsdam	True positives	Potsdam	True positives	Potsdam	exact assigned
ERR387710	Reading	4	Saintpaul	Failed	Saintpaul	Failed	Stanleyville	Failed
SRR1118712	Reading	4	Reading	True positives	Reading	True positives	Reading-I	exact assigned
SRR1686515	Reading	4	Reading	True positives	Reading	True positives	Reading-II	exact assigned
SRR2584401	Reading	4	Reading	True positives	Reading	True positives	Reading-I	exact assigned
ERR1046186	Rissen	4	Rissen	True positives	Rissen	True positives	Rissen,Hartford	partial assigned (one or more false positives)
SRR1249087	Rissen	4	Rissen	True positives	Rissen	True positives	Rissen,Hartford	partial assigned (one or more false positives)
SRR1969586	Rissen	4	Rissen	True positives	Rissen	True positives	Rissen,Hartford	partial assigned (one or more false positives)
SRR2989568	Rissen	4	Rissen	True positives	Rissen	True positives	Rissen,Hartford	partial assigned (one or more false positives)
SRR2082952	Rubislaw	9	Rubislaw	True positives	Rubislaw	True positives	Abaetetuba	Failed
SRR1021897	Rubislaw	9	Rubislaw	True positives	Rubislaw	True positives	Abaetetuba,Rubislaw	partial assigned (one or more false positives)
SRR1556110	Rubislaw	9	Rubislaw	True positives	Rubislaw	True positives	Abaetetuba,Rubislaw	partial assigned (one or more false positives)
SRR1567384	Rubislaw	9	Rubislaw	True positives	Rubislaw	True positives	Abaetetuba,Rubislaw	partial assigned (one or more false positives)
SRR1973887	Rubislaw	9	Rubislaw	True positives	Rubislaw	True positives	Rubislaw,Abaetetuba	partial assigned (one or more false positives)
SRR2124495	Rubislaw	9	Rubislaw	True positives	Rubislaw	True positives	Abaetetuba,Rubislaw	partial assigned (one or more false positives)
SRR2966842	Rubislaw	9	Rubislaw	True positives	Rubislaw	True positives	Abaetetuba,Rubislaw	partial assigned (one or more false positives)
SRR1105681	Rubislaw	9	Rubislaw	True positives	Rubislaw	True positives	Rubislaw	exact assigned
SRR5948980	Rubislaw	9	Rubislaw	True positives	Rubislaw	True positives	Rubislaw	exact assigned
SRR5583058	Saintpaul	26	Kisangani	Failed	Kisangani	Failed	0	Failed
SRR5921203	Saintpaul	26	Saintpaul	True positives	Saintpaul	True positives	0	Failed
ERR217445	Saintpaul	26	Haifa	Failed	Haifa	Failed	Saintpaul-I	exact assigned
ERR2213557	Saintpaul	26	Haifa	Failed	Haifa	Failed	Saintpaul-I	exact assigned
SRR1966053	Saintpaul	26	Haifa	Failed	Haifa	Failed	Saintpaul-I	exact assigned
SRR5049190	Saintpaul	26	Saintpaul	True positives	N/A (The predicted antigenic profile does not exist in the White-Kauffmann-Le Minor scheme)	Failed	Saintpaul-I	exact assigned
ERR1815495	Saintpaul	26	Saintpaul	True positives	Saintpaul	True positives	Saintpaul-I	exact assigned
ERR1837576	Saintpaul	26	Saintpaul	True positives	Saintpaul	True positives	Saintpaul-I	exact assigned
ERR2202572	Saintpaul	26	Saintpaul	True positives	Saintpaul	True positives	Saintpaul-I	exact assigned
SRR1060673	Saintpaul	26	Saintpaul	True positives	Saintpaul	True positives	Saintpaul-II	exact assigned
SRR1067629	Saintpaul	26	Saintpaul	True positives	Saintpaul	True positives	Saintpaul-II	exact assigned
SRR1300722	Saintpaul	26	Saintpaul	True positives	Saintpaul	True positives	Saintpaul-I	exact assigned
SRR1422645	Saintpaul	26	Saintpaul	True positives	Saintpaul	True positives	Saintpaul-I	exact assigned
SRR1634593	Saintpaul	26	Saintpaul	True positives	Saintpaul	True positives	Saintpaul-I	exact assigned
SRR1822479	Saintpaul	26	Saintpaul	True positives	Saintpaul	True positives	Saintpaul-II	exact assigned
SRR1967384	Saintpaul	26	Saintpaul	True positives	Saintpaul	True positives	Saintpaul-I	exact assigned
SRR1973998	Saintpaul	26	Saintpaul	True positives	Saintpaul	True positives	Saintpaul-II	exact assigned
SRR2043277	Saintpaul	26	Saintpaul	True positives	Saintpaul	True positives	Saintpaul-I	exact assigned
SRR3088890	Saintpaul	26	Saintpaul	True positives	Saintpaul	True positives	Saintpaul-I	exact assigned
SRR3665036	Saintpaul	26	Saintpaul	True positives	Saintpaul	True positives	Saintpaul-I	exact assigned
SRR4449969	Saintpaul	26	Saintpaul	True positives	Saintpaul	True positives	Saintpaul-I	exact assigned
SRR5055258	Saintpaul	26	Saintpaul	True positives	Saintpaul	True positives	Saintpaul-III	exact assigned
SRR5055970	Saintpaul	26	Saintpaul	True positives	Saintpaul	True positives	Saintpaul-I	exact assigned
SRR5500970	Saintpaul	26	Saintpaul	True positives	Saintpaul	True positives	Saintpaul-I	exact assigned
SRR5574872	Saintpaul	26	Saintpaul	True positives	Saintpaul	True positives	Saintpaul-I	exact assigned
SRR5584872	Saintpaul	26	Saintpaul	True positives	Saintpaul	True positives	Saintpaul-I	exact assigned
SRR5583916	Sandiego	13	Sandiego	True positives	Sandiego	True positives	Kottbus,Glostrup	Failed
SRR1965407	Sandiego	13	Sandiego	True positives	Sandiego	True positives	Chester,Sandiego	partial assigned (one or more false positives)
SRR1966977	Sandiego	13	Sandiego	True positives	Sandiego	True positives	Sandiego,Chester	partial assigned (one or more false positives)
SRR2102467	Sandiego	13	Sandiego	True positives	Sandiego	True positives	Chester,Sandiego	partial assigned (one or more false positives)
SRR5159432	Sandiego	13	Sandiego	True positives	Sandiego	True positives	Sandiego,Chester	partial assigned (one or more false positives)
SRR6238570	Sandiego	13	Sandiego	True positives	Sandiego	True positives	Sandiego,Chester	partial assigned (one or more false positives)
SRR1966680	Sandiego	13	Brandenburg	Failed	Brandenburg	Failed	Sandiego	exact assigned
SRR1068354	Sandiego	13	Sandiego	True positives	Sandiego	True positives	Sandiego	exact assigned
SRR1917493	Sandiego	13	Sandiego	True positives	Sandiego	True positives	Sandiego	exact assigned
SRR1965841	Sandiego	13	Sandiego	True positives	Sandiego	True positives	Sandiego	exact assigned
SRR3168968	Sandiego	13	Sandiego	True positives	Sandiego	True positives	Sandiego	exact assigned
SRR5508246	Sandiego	13	Sandiego	True positives	Sandiego	True positives	Sandiego	exact assigned
SRR5632767	Sandiego	13	Sandiego	True positives	Sandiego	True positives	Sandiego	exact assigned
ERR1823824	Schwarzengrund	22	Bredeney	Failed	Bredeney	Failed	Bredeney,Schwarzengrund	partial assigned (one or more false positives)
ERR2019232	Schwarzengrund	22	Bredeney	Failed	Bredeney	Failed	Bredeney,Schwarzengrund	partial assigned (one or more false positives)
SRR1002814	Schwarzengrund	22	Give	Failed	N/A (The predicted antigenic profile does not exist in the White-Kauffmann-Le Minor scheme)	Failed	Give-I&II,Schwarzengrund	partial assigned (one or more false positives)
SRR1233934	Schwarzengrund	22	Bredeney	Failed	Bredeney	Failed	Bredeney,Schwarzengrund	partial assigned (one or more false positives)
SRR1427105	Schwarzengrund	22	Give	Failed	Give	Failed	Give-I&II,Schwarzengrund	partial assigned (one or more false positives)
SRR1566538	Schwarzengrund	22	Give	Failed	Give	Failed	Give-I&II,Schwarzengrund	partial assigned (one or more false positives)
SRR1645776	Schwarzengrund	22	Bredeney	Failed	Bredeney	Failed	Give-I&II,Schwarzengrund	partial assigned (one or more false positives)
SRR1958263	Schwarzengrund	22	Kimuenza	Failed	Kimuenza or II [1],4,12,27:l,v:e,n,x*	Failed	Schwarzengrund,Give-I&II	partial assigned (one or more false positives)
SRR1967860	Schwarzengrund	22	Give	Failed	Give	Failed	Give-I&II,Schwarzengrund	partial assigned (one or more false positives)
SRR1970060	Schwarzengrund	22	Bredeney	Failed	Bredeney	Failed	Bredeney,Schwarzengrund	partial assigned (one or more false positives)
SRR2407746	Schwarzengrund	22	Bredeney	Failed	Bredeney	Failed	Bredeney,Schwarzengrund	partial assigned (one or more false positives)
SRR3479666	Schwarzengrund	22	Give	Failed	Give	Failed	Give-I&II,Schwarzengrund	partial assigned (one or more false positives)
SRR3572988	Schwarzengrund	22	Bredeney	Failed	Bredeney	Failed	Give-I&II,Schwarzengrund	partial assigned (one or more false positives)
SRR6042485	Schwarzengrund	22	Give	Failed	Give	Failed	Give-I&II,Schwarzengrund	partial assigned (one or more false positives)
SRR6677387	Schwarzengrund	22	Give	Failed	Give	Failed	Give-I&II,Schwarzengrund	partial assigned (one or more false positives)
ERR033998	Schwarzengrund	22	Schwarzengrund	True positives	N/A (The predicted antigenic profile does not exist in the White-Kauffmann-Le Minor scheme)	Failed	Bredeney,Schwarzengrund	partial assigned (one or more false positives)
SRR2082855	Schwarzengrund	22	Schwarzengrund	True positives	Schwarzengrund	True positives	Bredeney,Schwarzengrund	partial assigned (one or more false positives)
SRR2584395	Schwarzengrund	22	Schwarzengrund	True positives	Schwarzengrund	True positives	Bredeney,Schwarzengrund	partial assigned (one or more false positives)
SRR5599684	Schwarzengrund	22	Schwarzengrund	True positives	Schwarzengrund	True positives	Bredeney,Schwarzengrund	partial assigned (one or more false positives)
SRR5705183	Schwarzengrund	22	Schwarzengrund	True positives	Schwarzengrund	True positives	Bredeney,Schwarzengrund	partial assigned (one or more false positives)
SRR5890547	Schwarzengrund	22	Schwarzengrund	True positives	Schwarzengrund	True positives	Bredeney,Schwarzengrund	partial assigned (one or more false positives)
SRR6179083	Schwarzengrund	22	Schwarzengrund	True positives	Schwarzengrund	True positives	Bredeney,Schwarzengrund	partial assigned (one or more false positives)
ERR1715055	Senftenberg	17	Senftenberg	True positives	N/A (The predicted antigenic profile does not exist in the White-Kauffmann-Le Minor scheme)	Failed	Senftenberg-I&II	exact assigned
SRR2173977	Senftenberg	17	Senftenberg	True positives	N/A (The predicted antigenic profile does not exist in the White-Kauffmann-Le Minor scheme)	Failed	Senftenberg-I&II	exact assigned
ERR1251730	Senftenberg	17	Senftenberg	True positives	Senftenberg or Dessau*	True positives	Senftenberg-I&II	exact assigned
ERR1715100	Senftenberg	17	Senftenberg	True positives	Senftenberg or Dessau*	True positives	Senftenberg-I&II	exact assigned
ERR2223941	Senftenberg	17	Senftenberg	True positives	Senftenberg or Dessau*	True positives	Senftenberg-I&II	exact assigned
ERR316943	Senftenberg	17	Senftenberg	True positives	Senftenberg or Dessau*	True positives	Senftenberg-I&II	exact assigned
SRR1562628	Senftenberg	17	Senftenberg	True positives	Senftenberg or Dessau*	True positives	Senftenberg-I&II	exact assigned
SRR1645578	Senftenberg	17	Senftenberg	True positives	Senftenberg or Dessau*	True positives	Senftenberg-I&II	exact assigned
SRR1918955	Senftenberg	17	Senftenberg	True positives	Senftenberg or Dessau*	True positives	Senftenberg-I&II	exact assigned
SRR2124443	Senftenberg	17	Senftenberg	True positives	Senftenberg or Dessau*	True positives	Senftenberg-I&II	exact assigned
SRR3049162	Senftenberg	17	Senftenberg	True positives	Senftenberg or Dessau*	True positives	Senftenberg-I&II	exact assigned
SRR3173514	Senftenberg	17	Senftenberg	True positives	Senftenberg or Dessau*	True positives	Senftenberg-I&II	exact assigned
SRR3173642	Senftenberg	17	Senftenberg	True positives	Senftenberg or Dessau*	True positives	Senftenberg-I&II	exact assigned
SRR3344216	Senftenberg	17	Senftenberg	True positives	Senftenberg or Dessau*	True positives	Senftenberg-I&II	exact assigned
SRR3489812	Senftenberg	17	Senftenberg	True positives	Senftenberg or Dessau*	True positives	Senftenberg-I&II	exact assigned
SRR4175480	Senftenberg	17	Senftenberg	True positives	Senftenberg or Dessau*	True positives	Senftenberg-III	exact assigned
SRR5883560	Senftenberg	17	Senftenberg	True positives	Senftenberg or Dessau*	True positives	Senftenberg-I&II	exact assigned
SRR2087276	Soerenga	2	Soerenga	True positives	Soerenga	True positives	Soerenga	exact assigned
SRR5656409	Soerenga	2	Soerenga	True positives	Soerenga	True positives	Soerenga	exact assigned
ERR028648	Stanley	13	Stanley	True positives	N/A (The predicted antigenic profile does not exist in the White-Kauffmann-Le Minor scheme)	Failed	Stanley	exact assigned
ERR1865339	Stanley	13	Stanley	True positives	Stanley	True positives	Stanley	exact assigned
ERR1910832	Stanley	13	Stanley	True positives	Stanley	True positives	Stanley	exact assigned
SRR1777679	Stanley	13	Stanley	True positives	Stanley	True positives	Stanley	exact assigned
SRR1957787	Stanley	13	Stanley	True positives	Stanley	True positives	Stanley	exact assigned
SRR1965645	Stanley	13	Stanley	True positives	Stanley	True positives	Stanley	exact assigned
SRR1965935	Stanley	13	Stanley	True positives	Stanley	True positives	Stanley	exact assigned
SRR1967476	Stanley	13	Stanley	True positives	Stanley	True positives	Stanley	exact assigned
SRR1968205	Stanley	13	Stanley	True positives	Stanley	True positives	Stanley	exact assigned
SRR4420940	Stanley	13	Stanley	True positives	Stanley	True positives	Stanley	exact assigned
SRR5193111	Stanley	13	Stanley	True positives	Stanley	True positives	Stanley	exact assigned
SRR5336046	Stanley	13	Stanley	True positives	Stanley	True positives	Stanley	exact assigned
SRR5585327	Stanley	13	Stanley	True positives	Stanley	True positives	Stanley	exact assigned
SRR975467	Stanleyville	4	Saintpaul	Failed	Saintpaul	Failed	Stanleyville	exact assigned
SRR1548394	Stanleyville	4	Stanleyville	True positives	Stanleyville	True positives	Stanleyville	exact assigned
SRR1638970	Stanleyville	4	Stanleyville	True positives	Stanleyville	True positives	Stanleyville	exact assigned
SRR1967767	Stanleyville	4	Stanleyville	True positives	Stanleyville	True positives	Stanleyville	exact assigned
SRR2057366	Takoradi	2	Takoradi	True positives	Takoradi or Bargny*	True positives	Takoradi	exact assigned
SRR3457642	Takoradi	2	Takoradi	True positives	Takoradi or Bargny*	True positives	Takoradi	exact assigned
SRR1212359	Teko	2	Teko	True positives	Teko	True positives	Teko	exact assigned
SRR1777659	Teko	2	Teko	True positives	Teko	True positives	Teko	exact assigned
SRR1753735	Telelkebir	5	Telelkebir	True positives	Diguel or Telelkebir*	True positives	Telelkebir-II	exact assigned
SRR1969272	Telelkebir	5	Telelkebir	True positives	Diguel or Telelkebir*	True positives	Telelkebir-I	exact assigned
SRR2917928	Telelkebir	5	Telelkebir	True positives	Diguel or Telelkebir*	True positives	Telelkebir-II	exact assigned
SRR5145227	Telelkebir	5	Telelkebir	True positives	Diguel or Telelkebir*	True positives	Telelkebir-I	exact assigned
SRR5189050	Telelkebir	5	Telelkebir	True positives	Diguel or Telelkebir*	True positives	Telelkebir-I	exact assigned
ERR304870	Tennessee	4	Tennessee	True positives	II 6,7:z29:[z42] or Tennessee*	True positives	Tennessee	exact assigned
SRR1982225	Tennessee	4	Tennessee	True positives	II 6,7:z29:[z42] or Tennessee*	True positives	Tennessee	exact assigned
SRR2007639	Tennessee	4	Tennessee	True positives	II 6,7:z29:[z42] or Tennessee*	True positives	Tennessee	exact assigned
SRR3210476	Tennessee	4	Tennessee	True positives	II 6,7:z29:[z42] or Tennessee*	True positives	Tennessee	exact assigned
SRR1810564	Thompson	9	Thompson	True positives	Thompson	True positives	Thompson-II,Choleraesuis	partial assigned (one or more false positives)
ERR030122	Thompson	9	Thompson	True positives	N/A (The predicted antigenic profile does not exist in the White-Kauffmann-Le Minor scheme)	Failed	Thompson-I	exact assigned
ERR1743720	Thompson	9	Thompson	True positives	Thompson	True positives	Thompson-I	exact assigned
SRR1272779	Thompson	9	Thompson	True positives	Thompson	True positives	Thompson-II	exact assigned
SRR1730385	Thompson	9	Thompson	True positives	Thompson	True positives	Thompson-II	exact assigned
SRR2017867	Thompson	9	Thompson	True positives	Thompson	True positives	Thompson-I	exact assigned
SRR2182914	Thompson	9	Thompson	True positives	Thompson	True positives	Thompson-I	exact assigned
SRR6107345	Thompson	9	Thompson	True positives	Thompson	True positives	Thompson-I	exact assigned
SRR6760592	Thompson	9	Thompson	True positives	Thompson	True positives	Thompson-II	exact assigned
SRR1645378	Typhimurium	136	Kisangani	Failed	Kisangani	Failed	Heidelberg-I	Failed
SRR3182178	Typhimurium	136	Stanleyville	Failed	Stanleyville	Failed	Stanleyville	Failed
SRR1970301	Typhimurium	136	Typhimurium	True positives	Typhimurium	True positives	Heidelberg-I,Dublin	Failed
DRR107002	Typhimurium	136	Typhimurium	True positives	N/A (The predicted antigenic profile does not exist in the White-Kauffmann-Le Minor scheme)	Failed	Typhimurium	exact assigned
ERR023833	Typhimurium	136	Typhimurium	True positives	N/A (The predicted antigenic profile does not exist in the White-Kauffmann-Le Minor scheme)	Failed	Typhimurium	exact assigned
ERR023840	Typhimurium	136	Typhimurium	True positives	N/A (The predicted antigenic profile does not exist in the White-Kauffmann-Le Minor scheme)	Failed	Typhimurium	exact assigned
ERR024422	Typhimurium	136	Typhimurium	True positives	N/A (The predicted antigenic profile does not exist in the White-Kauffmann-Le Minor scheme)	Failed	Typhimurium	exact assigned
ERR024763	Typhimurium	136	Typhimurium	True positives	N/A (The predicted antigenic profile does not exist in the White-Kauffmann-Le Minor scheme)	Failed	Typhimurium	exact assigned
ERR024810	Typhimurium	136	Typhimurium	True positives	N/A (The predicted antigenic profile does not exist in the White-Kauffmann-Le Minor scheme)	Failed	Typhimurium	exact assigned
ERR026039	Typhimurium	136	Typhimurium	True positives	N/A (The predicted antigenic profile does not exist in the White-Kauffmann-Le Minor scheme)	Failed	Typhimurium	exact assigned
ERR026045	Typhimurium	136	Typhimurium	True positives	N/A (The predicted antigenic profile does not exist in the White-Kauffmann-Le Minor scheme)	Failed	Typhimurium	exact assigned
ERR026144	Typhimurium	136	Typhimurium	True positives	N/A (The predicted antigenic profile does not exist in the White-Kauffmann-Le Minor scheme)	Failed	Typhimurium	exact assigned
ERR028295	Typhimurium	136	Typhimurium	True positives	N/A (The predicted antigenic profile does not exist in the White-Kauffmann-Le Minor scheme)	Failed	Typhimurium	exact assigned
ERR029213	Typhimurium	136	Typhimurium	True positives	N/A (The predicted antigenic profile does not exist in the White-Kauffmann-Le Minor scheme)	Failed	Typhimurium	exact assigned
ERR029230	Typhimurium	136	Typhimurium	True positives	N/A (The predicted antigenic profile does not exist in the White-Kauffmann-Le Minor scheme)	Failed	Typhimurium	exact assigned
ERR038779	Typhimurium	136	Typhimurium	True positives	N/A (The predicted antigenic profile does not exist in the White-Kauffmann-Le Minor scheme)	Failed	Typhimurium	exact assigned
ERR038788	Typhimurium	136	Typhimurium	True positives	N/A (The predicted antigenic profile does not exist in the White-Kauffmann-Le Minor scheme)	Failed	Typhimurium	exact assigned
ERR062882	Typhimurium	136	Typhimurium	True positives	N/A (The predicted antigenic profile does not exist in the White-Kauffmann-Le Minor scheme)	Failed	Typhimurium	exact assigned
ERR1540577	Typhimurium	136	Typhimurium	True positives	N/A (The predicted antigenic profile does not exist in the White-Kauffmann-Le Minor scheme)	Failed	Typhimurium	exact assigned
ERR2210545	Typhimurium	136	Typhimurium	True positives	N/A (The predicted antigenic profile does not exist in the White-Kauffmann-Le Minor scheme)	Failed	Typhimurium	exact assigned
SRR1840732	Typhimurium	136	Typhimurium	True positives	Albert	Failed	Typhimurium	exact assigned
SRR2054278	Typhimurium	136	Typhimurium	True positives	N/A (The predicted antigenic profile does not exist in the White-Kauffmann-Le Minor scheme)	Failed	Typhimurium	exact assigned
SRR4101371	Typhimurium	136	Typhimurium	True positives	N/A (The predicted antigenic profile does not exist in the White-Kauffmann-Le Minor scheme)	Failed	Typhimurium	exact assigned
SRR4429067	Typhimurium	136	Typhimurium	True positives	N/A (The predicted antigenic profile does not exist in the White-Kauffmann-Le Minor scheme)	Failed	Typhimurium	exact assigned
SRR5051382	Typhimurium	136	Typhimurium	True positives	N/A (The predicted antigenic profile does not exist in the White-Kauffmann-Le Minor scheme)	Failed	Typhimurium	exact assigned
SRR5060633	Typhimurium	136	Typhimurium	True positives	N/A (The predicted antigenic profile does not exist in the White-Kauffmann-Le Minor scheme)	Failed	Typhimurium	exact assigned
SRR5387101	Typhimurium	136	Typhimurium	True positives	N/A (The predicted antigenic profile does not exist in the White-Kauffmann-Le Minor scheme)	Failed	Typhimurium	exact assigned
SRR5787078	Typhimurium	136	Typhimurium	True positives	N/A (The predicted antigenic profile does not exist in the White-Kauffmann-Le Minor scheme)	Failed	Typhimurium	exact assigned
SRR6116940	Typhimurium	136	Typhimurium	True positives	N/A (The predicted antigenic profile does not exist in the White-Kauffmann-Le Minor scheme)	Failed	Typhimurium	exact assigned
SRR6117465	Typhimurium	136	Typhimurium	True positives	Lagos	Failed	Typhimurium	exact assigned
DRR006256	Typhimurium	136	Typhimurium	True positives	Typhimurium	True positives	Typhimurium	exact assigned
DRR106883	Typhimurium	136	Typhimurium	True positives	Typhimurium	True positives	Typhimurium	exact assigned
ERR1040469	Typhimurium	136	Typhimurium	True positives	Typhimurium_O5-*	True positives	Typhimurium	exact assigned
ERR1040568	Typhimurium	136	Typhimurium	True positives	Typhimurium	True positives	Typhimurium	exact assigned
ERR1040576	Typhimurium	136	Typhimurium	True positives	Typhimurium_O5-*	True positives	Typhimurium	exact assigned
ERR1046294	Typhimurium	136	Typhimurium	True positives	Typhimurium	True positives	Typhimurium	exact assigned
ERR1251788	Typhimurium	136	Typhimurium	True positives	Typhimurium	True positives	Typhimurium	exact assigned
ERR1540338	Typhimurium	136	Typhimurium	True positives	Typhimurium	True positives	Typhimurium	exact assigned
ERR1556084	Typhimurium	136	Typhimurium	True positives	Typhimurium	True positives	Typhimurium	exact assigned
ERR1556231	Typhimurium	136	Typhimurium	True positives	Typhimurium	True positives	Typhimurium	exact assigned
ERR161428	Typhimurium	136	Typhimurium	True positives	Typhimurium	True positives	Typhimurium	exact assigned
ERR161978	Typhimurium	136	Typhimurium	True positives	Typhimurium	True positives	Typhimurium	exact assigned
ERR1737321	Typhimurium	136	Typhimurium	True positives	Typhimurium_O5-*	True positives	Typhimurium	exact assigned
ERR1740405	Typhimurium	136	Typhimurium	True positives	Typhimurium	True positives	Typhimurium	exact assigned
ERR1891253	Typhimurium	136	Typhimurium	True positives	Typhimurium	True positives	Typhimurium	exact assigned
ERR1891603	Typhimurium	136	Typhimurium	True positives	Typhimurium	True positives	Typhimurium	exact assigned
ERR1891613	Typhimurium	136	Typhimurium	True positives	Typhimurium	True positives	Typhimurium	exact assigned
ERR212559	Typhimurium	136	Typhimurium	True positives	Typhimurium	True positives	Typhimurium	exact assigned
ERR2136526	Typhimurium	136	Typhimurium	True positives	Typhimurium_O5-*	True positives	Typhimurium	exact assigned
ERR2204216	Typhimurium	136	Typhimurium	True positives	Typhimurium_O5-*	True positives	Typhimurium	exact assigned
ERR235279	Typhimurium	136	Typhimurium	True positives	Typhimurium	True positives	Typhimurium	exact assigned
ERR277205	Typhimurium	136	Typhimurium	True positives	Typhimurium	True positives	Typhimurium	exact assigned
ERR277214	Typhimurium	136	Typhimurium	True positives	Typhimurium	True positives	Typhimurium	exact assigned
ERR277228	Typhimurium	136	Typhimurium	True positives	Typhimurium_O5-*	True positives	Typhimurium	exact assigned
ERR341038	Typhimurium	136	Typhimurium	True positives	Typhimurium	True positives	Typhimurium	exact assigned
ERR350313	Typhimurium	136	Typhimurium	True positives	Typhimurium	True positives	Typhimurium	exact assigned
ERR350345	Typhimurium	136	Typhimurium	True positives	Typhimurium_O5-*	True positives	Typhimurium	exact assigned
ERR702888	Typhimurium	136	Typhimurium	True positives	Typhimurium	True positives	Typhimurium	exact assigned
ERR702913	Typhimurium	136	Typhimurium	True positives	Typhimurium	True positives	Typhimurium	exact assigned
ERR715562	Typhimurium	136	Typhimurium	True positives	Typhimurium	True positives	Typhimurium	exact assigned
ERR744205	Typhimurium	136	Typhimurium	True positives	Typhimurium_O5-*	True positives	Typhimurium	exact assigned
ERR775881	Typhimurium	136	Typhimurium	True positives	Typhimurium	True positives	Typhimurium	exact assigned
SRR1068366	Typhimurium	136	Typhimurium	True positives	Typhimurium	True positives	Typhimurium	exact assigned
SRR1122503	Typhimurium	136	Typhimurium	True positives	Typhimurium	True positives	Typhimurium	exact assigned
SRR1166608	Typhimurium	136	Typhimurium	True positives	Typhimurium	True positives	Typhimurium	exact assigned
SRR1177264	Typhimurium	136	Typhimurium	True positives	Typhimurium_O5-*	True positives	Typhimurium	exact assigned
SRR1203014	Typhimurium	136	Typhimurium	True positives	Typhimurium	True positives	Typhimurium	exact assigned
SRR1233947	Typhimurium	136	Typhimurium	True positives	Typhimurium_O5-*	True positives	Typhimurium	exact assigned
SRR1266028	Typhimurium	136	Typhimurium	True positives	Typhimurium_O5-*	True positives	Typhimurium	exact assigned
SRR1292252	Typhimurium	136	Typhimurium	True positives	Typhimurium	True positives	Typhimurium	exact assigned
SRR1300736	Typhimurium	136	Typhimurium	True positives	Typhimurium	True positives	Typhimurium	exact assigned
SRR1544167	Typhimurium	136	Typhimurium	True positives	Typhimurium_O5-*	True positives	Typhimurium	exact assigned
SRR1588666	Typhimurium	136	Typhimurium	True positives	Typhimurium	True positives	Typhimurium	exact assigned
SRR1617369	Typhimurium	136	Typhimurium	True positives	Typhimurium	True positives	Typhimurium	exact assigned
SRR1635099	Typhimurium	136	Typhimurium	True positives	Typhimurium	True positives	Typhimurium	exact assigned
SRR1636565	Typhimurium	136	Typhimurium	True positives	Typhimurium_O5-*	True positives	Typhimurium	exact assigned
SRR1645810	Typhimurium	136	Typhimurium	True positives	Typhimurium_O5-*	True positives	Typhimurium	exact assigned
SRR1645922	Typhimurium	136	Typhimurium	True positives	Typhimurium	True positives	Typhimurium	exact assigned
SRR1646070	Typhimurium	136	Typhimurium	True positives	Typhimurium	True positives	Typhimurium	exact assigned
SRR1687209	Typhimurium	136	Typhimurium	True positives	Typhimurium	True positives	Typhimurium	exact assigned
SRR1774093	Typhimurium	136	Typhimurium	True positives	Typhimurium	True positives	Typhimurium	exact assigned
SRR1957994	Typhimurium	136	Typhimurium	True positives	Typhimurium	True positives	Typhimurium	exact assigned
SRR1959314	Typhimurium	136	Typhimurium	True positives	Typhimurium	True positives	Typhimurium	exact assigned
SRR1960184	Typhimurium	136	Typhimurium	True positives	Typhimurium_O5-*	True positives	Typhimurium	exact assigned
SRR1965071	Typhimurium	136	Typhimurium	True positives	Typhimurium_O5-*	True positives	Typhimurium	exact assigned
SRR1966153	Typhimurium	136	Typhimurium	True positives	Typhimurium_O5-*	True positives	Typhimurium	exact assigned
SRR1966599	Typhimurium	136	Typhimurium	True positives	Typhimurium	True positives	Typhimurium	exact assigned
SRR1967097	Typhimurium	136	Typhimurium	True positives	Typhimurium	True positives	Typhimurium	exact assigned
SRR1967257	Typhimurium	136	Typhimurium	True positives	Typhimurium_O5-*	True positives	Typhimurium	exact assigned
SRR1967995	Typhimurium	136	Typhimurium	True positives	Typhimurium	True positives	Typhimurium	exact assigned
SRR1969241	Typhimurium	136	Typhimurium	True positives	Typhimurium_O5-*	True positives	Typhimurium	exact assigned
SRR1970235	Typhimurium	136	Typhimurium	True positives	Typhimurium	True positives	Typhimurium	exact assigned
SRR2015059	Typhimurium	136	Typhimurium	True positives	Typhimurium_O5-*	True positives	Typhimurium	exact assigned
SRR2566897	Typhimurium	136	Typhimurium	True positives	Typhimurium_O5-*	True positives	Typhimurium	exact assigned
SRR3049232	Typhimurium	136	Typhimurium	True positives	Typhimurium	True positives	Typhimurium	exact assigned
SRR3049529	Typhimurium	136	Typhimurium	True positives	Typhimurium	True positives	Typhimurium	exact assigned
SRR3049561	Typhimurium	136	Typhimurium	True positives	Typhimurium_O5-*	True positives	Typhimurium	exact assigned
SRR3115186	Typhimurium	136	Typhimurium	True positives	Typhimurium_O5-*	True positives	Typhimurium	exact assigned
SRR3286667	Typhimurium	136	Typhimurium	True positives	Typhimurium	True positives	Typhimurium	exact assigned
SRR3286932	Typhimurium	136	Typhimurium	True positives	Typhimurium	True positives	Typhimurium	exact assigned
SRR3323011	Typhimurium	136	Typhimurium	True positives	Typhimurium_O5-*	True positives	Typhimurium	exact assigned
SRR3509869	Typhimurium	136	Typhimurium	True positives	Typhimurium_O5-*	True positives	Typhimurium	exact assigned
SRR3664625	Typhimurium	136	Typhimurium	True positives	Typhimurium_O5-*	True positives	Typhimurium	exact assigned
SRR4011979	Typhimurium	136	Typhimurium	True positives	Typhimurium	True positives	Typhimurium	exact assigned
SRR4429080	Typhimurium	136	Typhimurium	True positives	Typhimurium	True positives	Typhimurium	exact assigned
SRR5081553	Typhimurium	136	Typhimurium	True positives	Typhimurium	True positives	Typhimurium	exact assigned
SRR5084261	Typhimurium	136	Typhimurium	True positives	Typhimurium	True positives	Typhimurium	exact assigned
SRR5182240	Typhimurium	136	Typhimurium	True positives	Typhimurium	True positives	Typhimurium	exact assigned
SRR5201369	Typhimurium	136	Typhimurium	True positives	Typhimurium	True positives	Typhimurium	exact assigned
SRR5209204	Typhimurium	136	Typhimurium	True positives	Typhimurium	True positives	Typhimurium	exact assigned
SRR5215736	Typhimurium	136	Typhimurium	True positives	Typhimurium	True positives	Typhimurium	exact assigned
SRR5221460	Typhimurium	136	Typhimurium	True positives	Typhimurium	True positives	Typhimurium	exact assigned
SRR5249618	Typhimurium	136	Typhimurium	True positives	Typhimurium	True positives	Typhimurium	exact assigned
SRR5342973	Typhimurium	136	Typhimurium	True positives	Typhimurium	True positives	Typhimurium	exact assigned
SRR5440630	Typhimurium	136	Typhimurium	True positives	Typhimurium	True positives	Typhimurium	exact assigned
SRR5451255	Typhimurium	136	Typhimurium	True positives	Typhimurium	True positives	Typhimurium	exact assigned
SRR5585273	Typhimurium	136	Typhimurium	True positives	Typhimurium	True positives	Typhimurium	exact assigned
SRR5605806	Typhimurium	136	Typhimurium	True positives	Typhimurium	True positives	Typhimurium	exact assigned
SRR5632237	Typhimurium	136	Typhimurium	True positives	Typhimurium	True positives	Typhimurium	exact assigned
SRR5676372	Typhimurium	136	Typhimurium	True positives	Typhimurium_O5-*	True positives	Typhimurium	exact assigned
SRR5725218	Typhimurium	136	Typhimurium	True positives	Typhimurium	True positives	Typhimurium	exact assigned
SRR5820844	Typhimurium	136	Typhimurium	True positives	Typhimurium_O5-*	True positives	Typhimurium	exact assigned
SRR5886297	Typhimurium	136	Typhimurium	True positives	Typhimurium_O5-*	True positives	Typhimurium	exact assigned
SRR5908129	Typhimurium	136	Typhimurium	True positives	Typhimurium	True positives	Typhimurium	exact assigned
SRR5970154	Typhimurium	136	Typhimurium	True positives	Typhimurium_O5-*	True positives	Typhimurium	exact assigned
SRR6051382	Typhimurium	136	Typhimurium	True positives	Typhimurium	True positives	Typhimurium	exact assigned
SRR6051463	Typhimurium	136	Typhimurium	True positives	Typhimurium	True positives	Typhimurium	exact assigned
SRR6062436	Typhimurium	136	Typhimurium	True positives	Typhimurium_O5-*	True positives	Typhimurium	exact assigned
SRR6116801	Typhimurium	136	Typhimurium	True positives	Typhimurium_O5-*	True positives	Typhimurium	exact assigned
SRR6116953	Typhimurium	136	Typhimurium	True positives	Typhimurium_O5-*	True positives	Typhimurium	exact assigned
SRR6117094	Typhimurium	136	Typhimurium	True positives	Typhimurium	True positives	Typhimurium	exact assigned
SRR6117250	Typhimurium	136	Typhimurium	True positives	Typhimurium_O5-*	True positives	Typhimurium	exact assigned
SRR6129383	Typhimurium	136	Typhimurium	True positives	Typhimurium_O5-*	True positives	Typhimurium	exact assigned
SRR6311228	Typhimurium	136	Typhimurium	True positives	Typhimurium	True positives	Typhimurium	exact assigned
SRR6350744	Typhimurium	136	Typhimurium	True positives	Typhimurium_O5-*	True positives	Typhimurium	exact assigned
SRR6386378	Typhimurium	136	Typhimurium	True positives	Typhimurium	True positives	Typhimurium	exact assigned
SRR5235600	Uganda	6	Uganda	True positives	Uganda	True positives	Paratyphi_B	Failed
SRR1645985	Uganda	6	Zanzibar	Failed	Zanzibar	Failed	Uganda,Kottbus	partial assigned (one or more false positives)
SRR5251249	Uganda	6	Zanzibar	Failed	N/A (The predicted antigenic profile does not exist in the White-Kauffmann-Le Minor scheme)	Failed	Kottbus,Uganda	partial assigned (one or more false positives)
ERR2286242	Uganda	6	Uganda	True positives	Uganda	True positives	Uganda	exact assigned
SRR4449751	Uganda	6	Uganda	True positives	Uganda	True positives	Uganda	exact assigned
SRR5441700	Uganda	6	Uganda	True positives	Uganda	True positives	Uganda	exact assigned
ERR1082803	Virchow	14	Virchow	True positives	Virchow	True positives	Virchow	exact assigned
ERR1216911	Virchow	14	Virchow	True positives	Virchow	True positives	Virchow	exact assigned
ERR1714719	Virchow	14	Virchow	True positives	Virchow	True positives	Virchow	exact assigned
ERR235162	Virchow	14	Virchow	True positives	Virchow	True positives	Virchow	exact assigned
SRR1041534	Virchow	14	Virchow	True positives	Virchow	True positives	Virchow	exact assigned
SRR1363312	Virchow	14	Virchow	True positives	Virchow	True positives	Virchow	exact assigned
SRR1645259	Virchow	14	Virchow	True positives	Virchow	True positives	Virchow	exact assigned
SRR1645991	Virchow	14	Virchow	True positives	Virchow	True positives	Virchow	exact assigned
SRR1653423	Virchow	14	Virchow	True positives	Virchow	True positives	Virchow	exact assigned
SRR1958564	Virchow	14	Virchow	True positives	Virchow	True positives	Virchow	exact assigned
SRR1966072	Virchow	14	Virchow	True positives	Virchow	True positives	Virchow	exact assigned
SRR1969154	Virchow	14	Virchow	True positives	Virchow	True positives	Virchow	exact assigned
SRR2032008	Virchow	14	Virchow	True positives	Virchow	True positives	Virchow	exact assigned
SRR2121692	Virchow	14	Virchow	True positives	Virchow	True positives	Virchow	exact assigned
SRR3225400	Wandsworth	5	Wandsworth	True positives	N/A (The predicted antigenic profile does not exist in the White-Kauffmann-Le Minor scheme)	Failed	Wandsworth	exact assigned
SRR1170882	Wandsworth	5	Wandsworth	True positives	Wandsworth	True positives	Wandsworth	exact assigned
SRR1810502	Wandsworth	5	Wandsworth	True positives	Wandsworth	True positives	Wandsworth	exact assigned
SRR1917500	Wandsworth	5	Wandsworth	True positives	Wandsworth	True positives	Wandsworth	exact assigned
SRR5584749	Wandsworth	5	Wandsworth	True positives	Wandsworth	True positives	Wandsworth	exact assigned
SRR4093296	Weltevreden	7	Weltevreden	True positives	N/A (The predicted antigenic profile does not exist in the White-Kauffmann-Le Minor scheme)	Failed	Weltevreden	exact assigned
ERR1046288	Weltevreden	7	Weltevreden	True positives	Weltevreden	True positives	Weltevreden	exact assigned
ERR495275	Weltevreden	7	Weltevreden	True positives	Weltevreden	True positives	Weltevreden	exact assigned
SRR1258619	Weltevreden	7	Weltevreden	True positives	Weltevreden	True positives	Weltevreden	exact assigned
SRR1726168	Weltevreden	7	Weltevreden	True positives	Weltevreden	True positives	Weltevreden	exact assigned
SRR1730391	Weltevreden	7	Weltevreden	True positives	Weltevreden	True positives	Weltevreden	exact assigned
SRR1745546	Weltevreden	7	Weltevreden	True positives	Weltevreden	True positives	Weltevreden	exact assigned

## Sheet: Specificity
The total genomes	1089
True positives	exact assigned + partial assigned (one or more false positives)
Failed	no serovar or incorrect serovars called
Specificity	(True positives/The total genomes)*100%
Prediction appraoch	True positives	Failed	Specificity (in this study)	Speicifity (Yoshida et al., 2016)
SISTR	1034	55	0.9495	0.948
SeqSero	902	187	0.8283	0.882
Serovar-specific gene	1038	51	0.9532
